# Supplementary material
Source: PubMed Central journal article supplement (PMC7649829)
Supplement: MD-011-D0MD00059K-s001.pdf [file MD-011-D0MD00059K-s001.pdf]

## SUPPORTING INFORMATION

### Synthesis and Anti-HBV Activity of Carbocyclic Nucleoside Hybrids with Salient Features of Entecavir and Aristeromycin

Ramakrishnamraju Samunuri<sup>a,b</sup>, Masaaki Toyama<sup>c</sup>, Renuka Sivasankar Pallaka,<sup>b</sup> Seshubabu Neeladri,<sup>b</sup> Ashok Kumar Jha<sup>b</sup>, Masanori Baba<sup>c</sup>, Chandralata Bal<sup>a,\*</sup>

<sup>a</sup>*Department of Chemistry, Birla Institute of Technology, Mesra, Ranchi, India*

<sup>b</sup>*Chemistry Services, GVK Biosciences Pvt.Ltd, IDA Nacharam, Hyderabad, India*

<sup>c</sup>*Division of Antiviral Chemotherapy, Joint Research Center for Human Retrovirus Infection, Kagoshima University, 8-35-1, Sakuragaoka, Kagoshima, 890-8544, Japan*

\*Email: cbal@bitmesra.ac.in

### Experimental Section:

The <sup>1</sup>H and <sup>13</sup>C NMR spectroscopic data were recorded at 300 MHz or 400 MHz and 75 MHz or 100 MHz on a Varian NMR spectrometer with CDCl<sub>3</sub>, DMSO-*d*<sub>6</sub> or CD<sub>3</sub>OD as a solvent and in some cases TMS as internal standard ( $\delta = 0$ ). Chemical shifts of <sup>1</sup>H and <sup>13</sup>C NMR spectra are reported in ppm. All coupling constants (*J* values) were expressed in Hertz (Hz). Multiplicities are stated as follows: singlet (s), doublet (d), double doublet (dd), triplet (t), and multiplet (m). Glassware for moisture-sensitive reactions was carried out under an atmosphere of argon. Melting points were recorded on a BUCHI (B-540) apparatus and are uncorrected. High-resolution mass spectra were recorded on a Thermo Q Exactive (resolution = 1, 40, 000 FWHM) under electrospray ionization (ESI) and are reported to four decimal places. Specific optical rotation measurements were carried out on a JASCO P-2000 digital polarimeter at 20 °C equipped with a PMT detector using the sodium line at 589 nm, and 2 mL (100 mm path length) cell. UV spectra were recorded on a Thermo Scientific Evolution 201 and 220 UV-Visible Spectrophotometers.

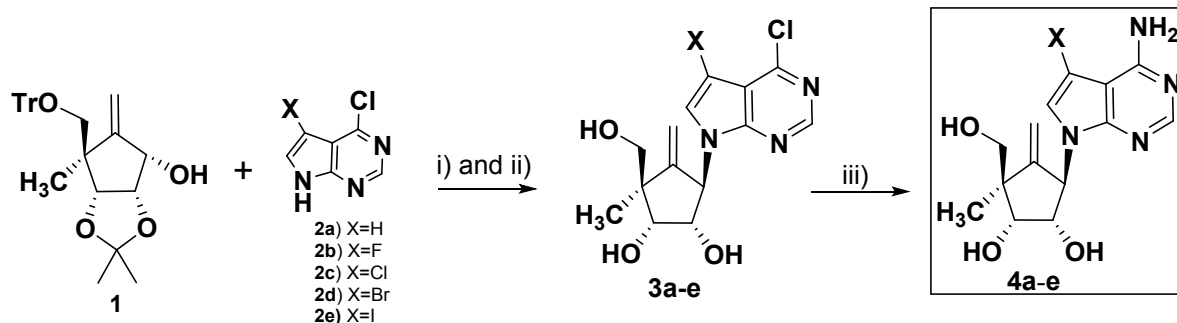

**Scheme 1:** Synthesis of **4a-e**. Reagents and conditions: **i)**  $\text{PPh}_3$ , DIAD, THF, 10 °C-rt, 1 h; **ii)** TFA: $\text{H}_2\text{O}$  (8:2 ratio), rt, 30 min; **iii)**  $\text{NH}_3$  in MeOH, 100 °C, sealed tube, 24 h.

**General procedure for the synthesis of 3a-e:** To a stirring solution of **1** (0.54 mmol), appropriate **2a-e** (0.71 mmol) and  $\text{Ph}_3\text{P}$  (1.36 mmol) in 5 ml dry THF was added DIAD (1.50 mmol) drop wise at 5-10 °C under argon atmosphere, stirring continued at rt for 1 h. Completion of reaction was monitored by TLC, volatiles were removed under reduced pressure. 10 mL TFA: water (8:2 ratio) was added to the crude at rt and stirred for 30 min. Up on consumption of starting material, the volatiles were removed under reduced pressure. The crude residue was partitioned between sat.  $\text{NaHCO}_3$  solution (10 mL) and EtOAc (3 x 25 mL). The combined organic layer was washed with brine solution, dried over anhydrous  $\text{Na}_2\text{SO}_4$  and evaporated under reduced pressure. The resulting residue was purified by column chromatography on silica gel (100-200 mesh), eluting up to 5% MeOH in  $\text{CH}_2\text{Cl}_2$ .

**(1S,2R,3R,5R)-5-(4-Chloro-7H-pyrrolo[2,3-*d*]pyrimidin-7-yl)-3-(hydroxymethyl)-3-methyl-4-methylenecyclopentane-1,2-diol (3a):** Purified yield: 45.4% (in two steps), off white solid, (TLC:  $R_f$  0.3, 7% MeOH in  $\text{CH}_2\text{Cl}_2$ );  $[\alpha]_{\text{D}}^{25}$ : +21.6 ( $c$  = 0.25, MeOH); UV (MeOH)  $\lambda_{\text{max}}$ : 273.25 nm;  $^1\text{H}$  NMR (400 MHz,  $\text{CD}_3\text{OD}$ )  $\delta$ : 1.21 (s, 3H), 3.52 (d,  $J$  = 11.2 Hz, 1H), 3.69 (d,  $J$  = 11.2 Hz, 1H), 4.03 (d,  $J$  = 4.4 Hz, 1H), 4.51 (d,  $J$  = 2.8 Hz, 1H), 4.77 (dd,  $J$  = 4.4 and 9.6 Hz, 1H), 5.07 (d,  $J$  = 3.2 Hz, 1H), 5.68–5.71 (m, 1H), 6.71 (d,  $J$  = 3.6 Hz, 1H), 7.64 (d,  $J$  = 3.6 Hz, 1H), 8.53 (s, 1H); MS-ESI ( $m/z$ ):  $[\text{M}+1]^+$  309.97.

**(1S,2R,3R,5R)-5-(4-Chloro-5-fluoro-7H-pyrrolo[2,3-*d*]pyrimidin-7-yl)-3-(hydroxymethyl)-3-methyl-4-methylenecyclopentane-1,2-diol (3b):** Purified yield: 52% (in two steps), pale yellow solid, (TLC:  $R_f$  0.3, 7% MeOH in  $\text{CH}_2\text{Cl}_2$ );  $[\alpha]_{\text{D}}^{20}$ : +6.4 ( $c$  = 0.25, DMSO); UV (MeOH)  $\lambda_{\text{max}}$ : 273.25 nm;  $^1\text{H}$  NMR (300 MHz,  $\text{CD}_3\text{OD}$ )  $\delta$ : 1.19 (s, 3H), 3.51 (d,  $J$  = 11.1 Hz, 1H), 3.65 (d,  $J$  = 10.8 Hz, 1H), 4.00 (d,  $J$  = 4.5 Hz, 1H), 4.57 (d,  $J$  = 2.7 Hz, 1H), 4.65 (dd,  $J$  = 4.5 and 10.2 Hz, 1H), 5.09 (d,  $J$  = 3.0 Hz, 1H), 5.75–5.78 (m, 1H), 7.50 (d,  $J$  = 2.1 Hz, 1H), 8.55 (s, 1H); MS-ESI ( $m/z$ ):  $[\text{M}+1]^+$  327.85.

**(1S,2R,3R,5R)-5-(4,5-Dichloro-7H-pyrrolo[2,3-*d*]pyrimidin-7-yl)-3-(hydroxymethyl)-3-methyl-4-methylenecyclopentane-1,2-diol (3c):** Purified yield: 65.6% (in two steps), off white

solid, (TLC:  $R_f$  0.3, 7% MeOH in  $\text{CH}_2\text{Cl}_2$ );  $[\alpha]_D^{20}$ :  $-3.39$  ( $c = 0.25$ , DMSO); UV (MeOH)  $\lambda_{\text{max}}$ : 273.25 nm;  $^1\text{H}$  NMR (400 MHz,  $\text{CD}_3\text{OD}$ )  $\delta$ : 1.20 (s, 3H), 3.52 (d,  $J = 10.4$  Hz, 1H), 3.66 (d,  $J = 11.6$  Hz, 1H), 4.01 (d,  $J = 4.4$  Hz, 1H), 4.56 (d,  $J = 2.4$  Hz, 1H), 4.69 (dd,  $J = 4.8$  and 10.0 Hz, 1H), 5.09 (d,  $J = 3.2$  Hz, 1H), 5.74–5.78 (m, 1H), 7.71 (s, 1H), 8.56 (s, 1H); MS-ESI ( $m/z$ ):  $[\text{M}+1]^+$  343.89.

**(1S,2R,3R,5R)-5-(5-Bromo-4-chloro-7H-pyrrolo[2,3-*d*]pyrimidin-7-yl)-3-(hydroxymethyl)-3-methyl-4-methylenecyclopentane-1,2-diol (3d)**: Purified yield: 70.7% (in two steps), off white solid, (TLC:  $R_f$  0.3, 7% MeOH in  $\text{CH}_2\text{Cl}_2$ );  $[\alpha]_D^{20}$ :  $+7.66$  ( $c = 0.25$ , DMSO); UV (MeOH)  $\lambda_{\text{max}}$ : 273.25 nm;  $^1\text{H}$  NMR (400 MHz,  $\text{CD}_3\text{OD}$ )  $\delta$ : 1.20 (s, 3H), 3.52 (d,  $J = 10.8$  Hz, 1H), 3.67 (d,  $J = 11.2$  Hz, 1H), 4.01 (d,  $J = 4.8$  Hz, 1H), 4.56 (d,  $J = 2.8$  Hz, 1H), 4.71 (dd,  $J = 4.8$  and 10.4 Hz, 1H), 5.09 (d,  $J = 3.6$  Hz, 1H), 5.74–5.78 (m, 1H), 7.77 (s, 1H), 8.56 (s, 1H); MS-ESI ( $m/z$ ):  $[\text{M}+1]^+$  387.83 and  $[\text{M}+2]^+$  389.81.

**(1S,2R,3R,5R)-5-(4-Chloro-5-iodo-7H-pyrrolo[2,3-*d*]pyrimidin-7-yl)-3-(hydroxymethyl)-3-methyl-4-methylenecyclopentane-1,2-diol (3e)**: Purified yield: 84.2% (in two steps), off white solid, (TLC:  $R_f$  0.3, 7% MeOH in  $\text{CH}_2\text{Cl}_2$ );  $[\alpha]_D^{20}$ :  $+8.99$  ( $c = 0.25$ , DMSO); UV (MeOH)  $\lambda_{\text{max}}$ : 272.25 nm;  $^1\text{H}$  NMR (400 MHz,  $\text{CD}_3\text{OD}$ )  $\delta$ : 1.19 (s, 3H), 3.52 (d,  $J = 10.8$  Hz, 1H), 3.67 (d,  $J = 10.8$  Hz, 1H), 4.01 (d,  $J = 4.4$  Hz, 1H), 4.54 (d,  $J = 2.8$  Hz, 1H), 4.72 (dd,  $J = 4.4$  and 10.0 Hz, 1H), 5.08 (d,  $J = 2.8$  Hz, 1H), 5.72–5.76 (m, 1H), 7.83 (s, 1H), 8.54 (s, 1H); MS-ESI ( $m/z$ ):  $[\text{M}+1]^+$  435.80.

**General procedure for the synthesis of 4a-e:** A screw-cap vial equipped with a magnetic bar was charged with  $\text{NH}_3$  in methanol (7M, 7 ml) and appropriate **3a-e** (0.80 mmol) was added. The vial was sealed and heated to 100 °C with stirring for 24 h. The reaction mixture was concentrated under reduced pressure and crude was purified by flash chromatography on silica gel (230-400 mesh, elution gradient 0-9% MeOH in  $\text{CH}_2\text{Cl}_2$ ).

**(1S,2R,3R,5R)-5-(4-Amino-7H-pyrrolo[2,3-*d*]pyrimidin-7-yl)-3-(hydroxymethyl)-3-methyl-4-methylenecyclopentane-1,2-diol (4a)**: Purified yield: 78%, off white solid, (TLC:  $R_f$  0.2, 10% MeOH in  $\text{CH}_2\text{Cl}_2$ );  $[\alpha]_D^{20}$ :  $+2.73$  ( $c = 0.25$ , DMSO); mp: 210–220 °C; UV (MeOH)  $\lambda_{\text{max}}$ : 274.25 nm;  $^1\text{H}$  NMR (400 MHz,  $\text{CD}_3\text{OD}$ )  $\delta$ : 1.19 (s, 3H), 3.51 (d,  $J = 10.8$  Hz, 1H), 3.66 (d,  $J = 10.8$  Hz, 1H), 4.01 (d,  $J = 5.2$  Hz, 1H), 4.55 (d,  $J = 3.2$  Hz, 1H), 4.73 (dd,  $J = 4.4$  and 9.6 Hz, 1H), 5.07 (d,  $J = 3.2$  Hz, 1H), 5.50–5.53 (m, 1H), 6.70 (d,  $J = 3.2$  Hz, 1H), 7.27 (d,  $J = 3.2$  Hz, 1H), 8.08 (s, 1H);  $^{13}\text{C}$  NMR (100 MHz,  $\text{DMSO}-d_6$ )  $\delta$ : 18.9, 49.2, 62.7, 69.2, 73.5, 74.3, 99.8, 102.0, 107.8, 123.8, 148.3, 149.5, 155.0, 155.3; HRMS (ESI-Orbitrap)  $m/z$ : Exact mass calculated for  $\text{C}_{14}\text{H}_{19}\text{N}_4\text{O}_3$   $[\text{M}+\text{H}]^+$ : 291.1457, found: 291.1422.

**(1S,2R,3R,5R)-5-(4-Amino-5-fluoro-7H-pyrrolo[2,3-*d*]pyrimidin-7-yl)-3-(hydroxymethyl)-3-methyl-4-methylenecyclopentane-1,2-diol (4b)**: Purified yield: 55%, off white solid, (TLC:  $R_f$  0.2, 10% MeOH in  $\text{CH}_2\text{Cl}_2$ );  $[\alpha]_D^{20}$ :  $-6.43$  ( $c = 0.25$ , DMSO); mp: 243–247 °C; UV (MeOH)  $\lambda_{\text{max}}$ : 280.25 nm;  $^1\text{H}$  NMR (300 MHz,  $\text{CD}_3\text{OD}$ )  $\delta$ : 1.18 (s, 3H), 3.50 (d,  $J = 10.8$  Hz, 1H), 3.63 (d,  $J = 10.8$  Hz, 1H), 3.98 (d,  $J = 4.8$  Hz, 1H), 4.59 (d,  $J = 3.2$  Hz, 1H), 4.63 (dd,  $J = 4.5$  and 9.6 Hz, 1H),

5.07 (d,  $J = 3.3$  Hz, 1H), 5.47–5.51 (m, 1H), 7.00 (d,  $J = 2.1$  Hz, 1H), 8.02 (s, 1H);  $^{19}\text{F}$  NMR (376 MHz, DMSO- $d_6$ )  $\delta$  : –168.25;  $^{13}\text{C}$  NMR (100 MHz, DMSO- $d_6$ )  $\delta$ : 18.9, 49.1, 62.0, 69.1, 73.4, 74.2, 91.9, 105.2, 107.8, 140.3, 146.4, 152.3, 154.2, 155.7; HRMS (ESI-Orbitrap)  $m/z$ : Exact mass calculated for  $\text{C}_{14}\text{H}_{18}\text{FN}_4\text{O}_3$   $[\text{M}+\text{H}]^+$ : 309.1285, found: 309.1325.

**(1*S*,2*R*,3*R*,5*R*)-5-(4-Amino-5-chloro-7*H*-pyrrolo[2,3-*d*]pyrimidin-7-yl)-3-(hydroxymethyl)-3-methyl-4-methylenecyclopentane-1,2-diol (4c):** Purified yield: 80%, off white solid, (TLC:  $R_f$  0.2, 10% MeOH in  $\text{CH}_2\text{Cl}_2$ );  $[\alpha]_{\text{D}}^{20}$ : –30.41 ( $c = 0.25$ , DMSO); mp: 226–229 °C; UV (MeOH)  $\lambda_{\text{max}}$ : 281.25 nm;  $^1\text{H}$  NMR (300 MHz,  $\text{CD}_3\text{OD}$ )  $\delta$ : 1.18 (s, 3H), 3.51 (d,  $J = 11.1$  Hz, 1H), 3.65 (d,  $J = 10.8$  Hz, 1H), 3.99 (d,  $J = 4.8$  Hz, 1H), 4.59 (d,  $J = 2.7$  Hz, 1H), 4.68 (dd,  $J = 4.8$  and 9.9 Hz, 1H), 5.08 (d,  $J = 3.0$  Hz, 1H), 5.46–5.51 (m, 1H), 7.24 (s, 1H), 8.05 (s, 1H);  $^{13}\text{C}$  NMR (100 MHz, DMSO- $d_6$ )  $\delta$ : 18.9, 49.2, 62.4, 69.1, 73.5, 74.2, 99.4, 101.4, 107.9, 120.0, 149.6, 152.2, 154.7, 156.7; HRMS (ESI-Orbitrap)  $m/z$ : Exact mass calculated for  $\text{C}_{14}\text{H}_{18}\text{ClN}_4\text{O}_3$   $[\text{M}+\text{H}]^+$ : 325.0989, found: 325.1031.

**(1*S*,2*R*,3*R*,5*R*)-5-(4-Amino-5-bromo-7*H*-pyrrolo[2,3-*d*] pyrimidin-7-yl)-3-(hydroxymethyl)-3-methyl-4-methylenecyclopentane-1,2-diol (4d):** Purified yield: 75%, off white solid, (TLC:  $R_f$  0.2, 10% MeOH in  $\text{CH}_2\text{Cl}_2$ );  $[\alpha]_{\text{D}}^{20}$ : +6.14 ( $c = 0.25$ , DMSO); mp: 228–232 °C; UV (MeOH)  $\lambda_{\text{max}}$ : 283.25 nm;  $^1\text{H}$  NMR (300 MHz,  $\text{CD}_3\text{OD}$ )  $\delta$ : 1.18 (s, 3H), 3.51 (d,  $J = 11.1$  Hz, 1H), 3.65 (d,  $J = 11.1$  Hz, 1H), 3.98 (d,  $J = 4.5$  Hz, 1H), 4.58 (d,  $J = 2.7$  Hz, 1H), 4.69 (dd,  $J = 4.8$  and 9.9 Hz, 1H), 5.08 (d,  $J = 2.7$  Hz, 1H), 5.48–5.51 (m, 1H), 7.30 (s, 1H), 8.04 (s, 1H);  $^{13}\text{C}$  NMR (100 MHz, DMSO- $d_6$ )  $\delta$ : 18.9, 49.2, 62.5, 69.1, 73.5, 74.2, 85.4, 100.6, 107.9, 122.5, 150.0, 152.0, 154.7, 156.8; HRMS (ESI-Orbitrap)  $m/z$ : Exact mass calculated for  $\text{C}_{14}\text{H}_{18}\text{BrN}_4\text{O}_3$   $[\text{M}+\text{H}]^+$ : 369.0484, found: 369.0522.

**(1*S*,2*R*,3*R*,5*R*)-5-(4-Amino-5-iodo-7*H*-pyrrolo[2,3-*d*]pyrimidin-7-yl)-3-(hydroxymethyl)-3-methyl-4-methylenecyclopentane-1,2-diol (4e):** Purified yield: 80%, off white solid, (TLC:  $R_f$  0.2, 10% MeOH in  $\text{CH}_2\text{Cl}_2$ );  $[\alpha]_{\text{D}}^{20}$ : +1.92 ( $c = 0.25$ , DMSO); mp: 227–228 °C; UV (MeOH)  $\lambda_{\text{max}}$ : 290.25 nm;  $^1\text{H}$  NMR (300 MHz,  $\text{CD}_3\text{OD}$ )  $\delta$ : 1.17 (s, 3H); 3.51 (d,  $J = 11.1$  Hz, 1H), 3.65 (d,  $J = 10.8$  Hz, 1H), 3.99 (d,  $J = 4.8$  Hz, 1H), 4.57 (d,  $J = 2.4$  Hz, 1H), 4.70 (dd,  $J = 4.8$  and 9.9 Hz, 1H), 5.07 (d,  $J = 3.0$  Hz, 1H), 5.40–5.50 (m, 1H), 7.37 (s, 1H), 8.04 (s, 1H);  $^{13}\text{C}$  NMR (100 MHz, DMSO- $d_6$ )  $\delta$ : 18.9, 49.2, 50.4, 62.6, 69.2, 73.6, 74.3, 102.8, 107.9, 127.9, 150.7, 151.6, 154.8, 157.1; HRMS (ESI-Orbitrap)  $m/z$ : Exact mass calculated for  $\text{C}_{14}\text{H}_{18}\text{IN}_4\text{O}_3$   $[\text{M}+\text{H}]^+$ : 417.0345, found: 417.0377.

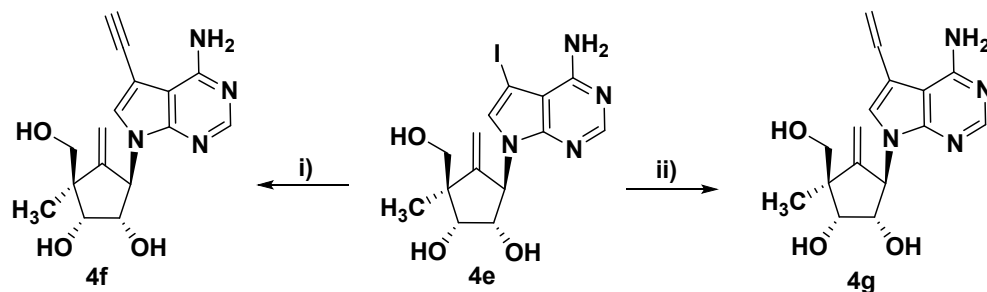

**Scheme 2.** Synthesis of 7-ethynyl/vinyl derivatives (4f-g). Reagents and conditions: i) a) Trimethylsilylacetylene, CuI, Et<sub>3</sub>N, Pd(PPh<sub>3</sub>)<sub>4</sub>, DMF, 50 °C, 3 h; b) K<sub>2</sub>CO<sub>3</sub>, MeOH, rt, 30 min; ii) Tri-*n*-butyl vinyl tin, Pd(PPh<sub>3</sub>)<sub>4</sub>, DMF, 110 °C, 3 h.

**Procedure for the synthesis of 4f:** A suspension of **4e** (0.60 mmol), trimethylsilyl acetylene (3.0 mmol), CuI (0.06 mmol), Et<sub>3</sub>N (3.0 mmol) and (PPh<sub>3</sub>)<sub>4</sub>Pd (0.06 mmol) in DMF was stirred at 50 °C under sealed condition for 3 h. The reaction mixture was concentrated under reduced pressure and crude was purified by silica gel (100-200 mesh) column chromatography, elution gradient 0-6% MeOH in CH<sub>2</sub>Cl<sub>2</sub> to afford trimethylsilyl protected compound. The deprotection was carried out by stirring in methanol and K<sub>2</sub>CO<sub>3</sub> (3.0 mmol) at rt for 30 min. The reaction mixture was concentrated under reduced pressure and purified by flash chromatography on silica gel (230-400 mesh), eluting gradient 0-7% MeOH in CH<sub>2</sub>Cl<sub>2</sub>.

**(1*S*,2*R*,3*R*,5*R*)-5-(4-Amino-5-ethynyl-7*H*-pyrrolo[2,3-*d*]pyrimidin-7-yl)-3-(hydroxymethyl)-3-methyl-4-methylenecyclopentane-1,2-diol (4f):** Purified yield: 62%, off white solid. (TLC: R<sub>f</sub> 0.1, 10% MeOH in CH<sub>2</sub>Cl<sub>2</sub>); [α]<sub>D</sub><sup>20</sup>: -2.17 (c = 0.25, DMSO); mp: 183-187 °C; UV (MeOH) λ<sub>max</sub>: 283.25 nm; <sup>1</sup>H NMR (400 MHz, CD<sub>3</sub>OD) δ: 1.18 (s, 3H), 3.51 (d, *J* = 10.8 Hz, 1H), 3.66 (d, *J* = 10.8 Hz, 1H), 3.70 (s, 1H), 3.99 (d, *J* = 4.4 Hz, 1H), 4.58 (d, *J* = 2.8 Hz, 1H), 4.72 (dd, *J* = 4.4 and 10.0 Hz, 1H), 5.08 (d, *J* = 3.2 Hz, 1H), 5.48-5.44 (m, 1H), 7.48 (s, 1H), 8.06 (s, 1H); <sup>13</sup>C NMR (100 MHz, DMSO-*d*<sub>6</sub>) δ: 18.9, 49.3, 62.8, 69.2, 73.5, 74.2, 77.7, 82.7, 93.0, 102.1, 108.0, 128.5, 150.0, 152.4, 154.8, 157.4; HRMS (ESI-Orbitrap) *m/z*: Exact mass calculated for C<sub>16</sub>H<sub>19</sub>N<sub>4</sub>O<sub>3</sub> [M+H]<sup>+</sup>: 315.1457, found: 315.1418.

**Procedure for the synthesis of 4g:** To a suspension of **4e** (0.6 mmol), Pd(PPh<sub>3</sub>)<sub>4</sub> (0.06 mmol) in anhydrous DMF under argon atmosphere, tri-*n*-butyl(vinyl)tin (1.8 mmol) was added. The resulting mixture was heated at 110 °C for 3 h under sealed condition. Upon completion of reaction, concentrated the volatile under reduced pressure and crude was purified by flash chromatography on silica gel (230-400 mesh), elution gradient 0-7% MeOH in CH<sub>2</sub>Cl<sub>2</sub>.

**(1*S*,2*R*,3*R*,5*R*)-5-(4-Amino-5-vinyl-7*H*-pyrrolo[2,3-*d*]pyrimidin-7-yl)-3-(hydroxymethyl)-3-methyl-4-methylenecyclopentane-1,2-diol (4g):** Purified yield: 60%, off white solid, (TLC: R<sub>f</sub> 0.1, 10% MeOH in CH<sub>2</sub>Cl<sub>2</sub>); [α]<sub>D</sub><sup>20</sup>: -14.28 (c = 0.25, DMSO); mp: 194-198 °C; UV (MeOH) λ<sub>max</sub>: 294.25 nm; <sup>1</sup>H NMR (300 MHz, CD<sub>3</sub>OD) δ: 1.19 (s, 3H), 3.52 (d, *J* = 11.1 Hz, 1H), 3.67 (d, *J* = 11.1 Hz, 1H), 4.00 (d, *J* = 4.8 Hz, 1H), 4.57 (d, *J* = 2.7 Hz, 1H), 4.78 (dd, *J* = 4.8 and 9.9 Hz, 1H), 5.07 (d, *J* = 3.3 Hz, 1H), 5.24 (dd, *J* = 1.5 and 10.8 Hz, 1H), 5.44-5.48 (m, 1H), 5.58 (dd, *J* = 1.8 and 17.4 Hz, 1H), 7.05 (dd, *J* = 10.8 and 11.1 Hz, 1H), 7.35 (s, 1H), 8.02 (s, 1H); <sup>13</sup>C NMR (100 MHz, DMSO-*d*<sub>6</sub>) δ: 18.9, 49.2, 62.3, 69.2, 73.5, 74.1, 100.2, 107.7, 112.1, 113.3, 120.0, 129.2, 151.1, 155.0, 157.5; HRMS (ESI-Orbitrap) *m/z*: Exact mass calculated for C<sub>16</sub>H<sub>21</sub>N<sub>4</sub>O<sub>3</sub> [M+H]<sup>+</sup>: 317.1614, found: 317.1575.

# <sup>1</sup>H and <sup>13</sup>C NMR Copies:

Sample Name:  
PMDR-C0368-180

Solvent: cd3od  
Date: Apr 6 2016  
Agilent 400-MR / NMR-3  
Request No: 021604A5815\_PROTON

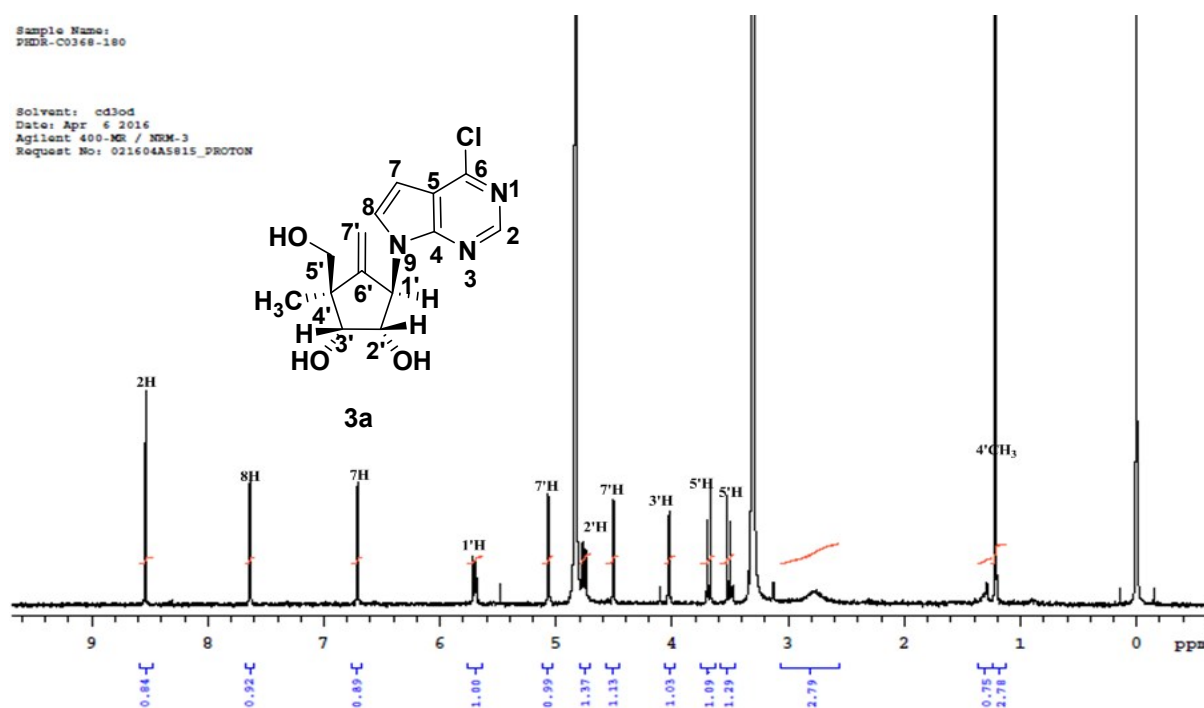

06042016-081 51 (1.525)

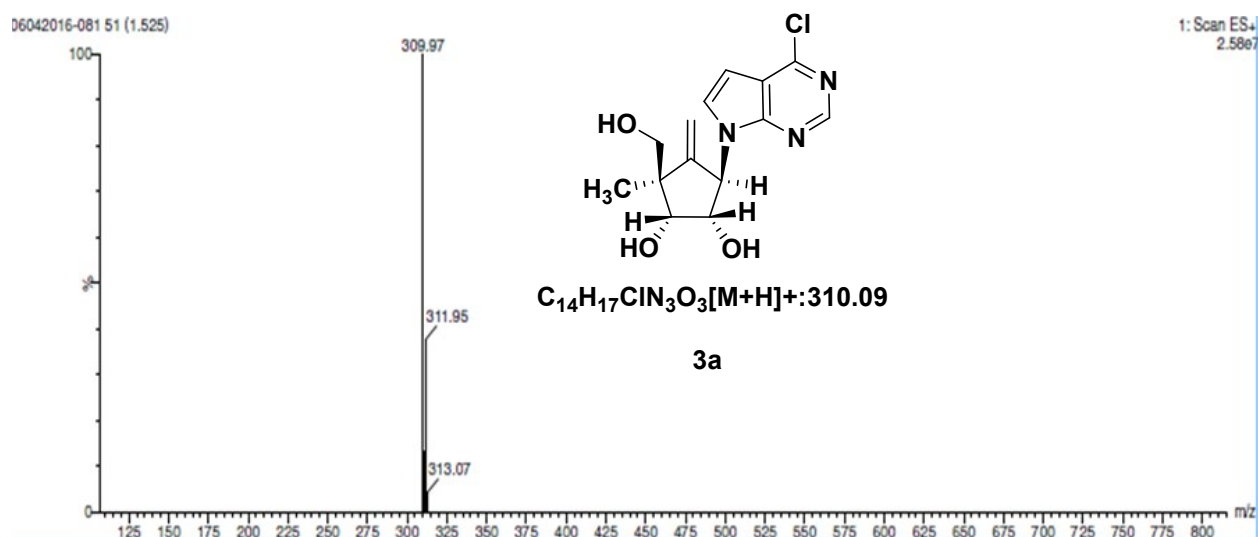

Sample Name:  
PHDR-C0368-186

Solvent: cd3od  
Date: Apr 12 2016  
Agilent Mercury-300/ NMR-3  
Request No: 021604A9588\_PROTON

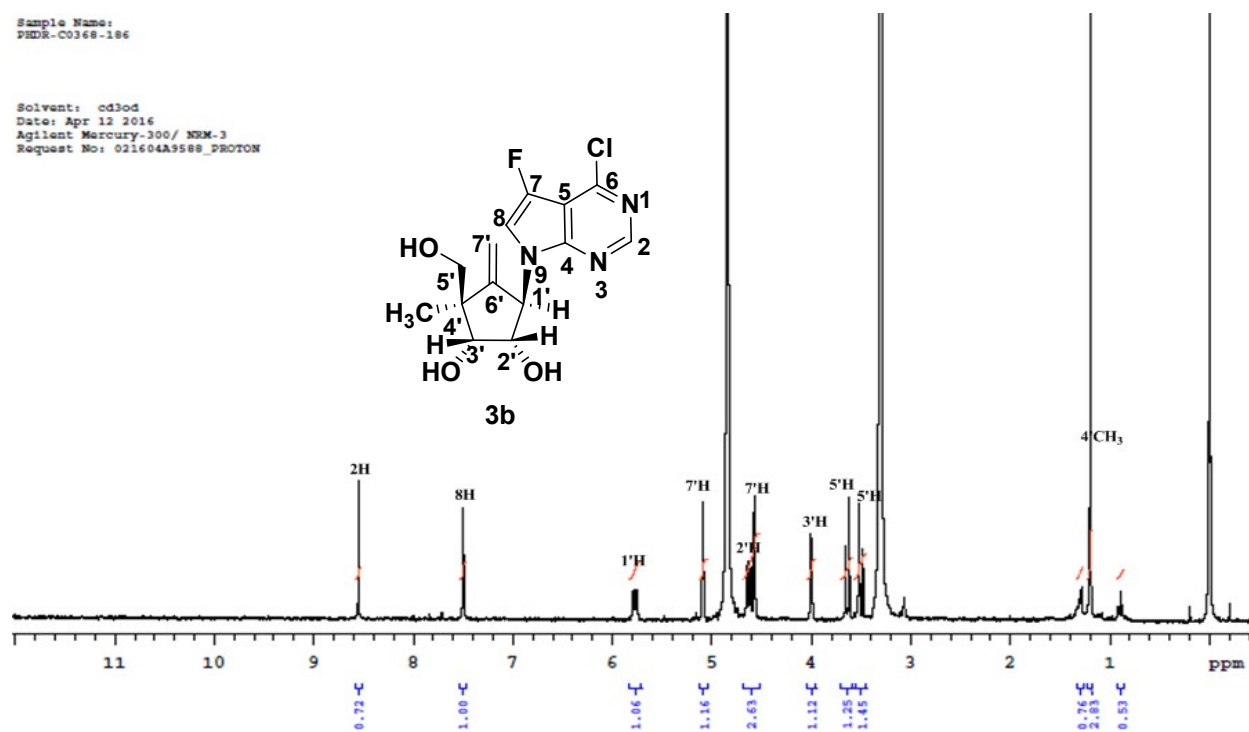

12042016-033 55 (1.646)

1: Scan ES+  
3.86e7

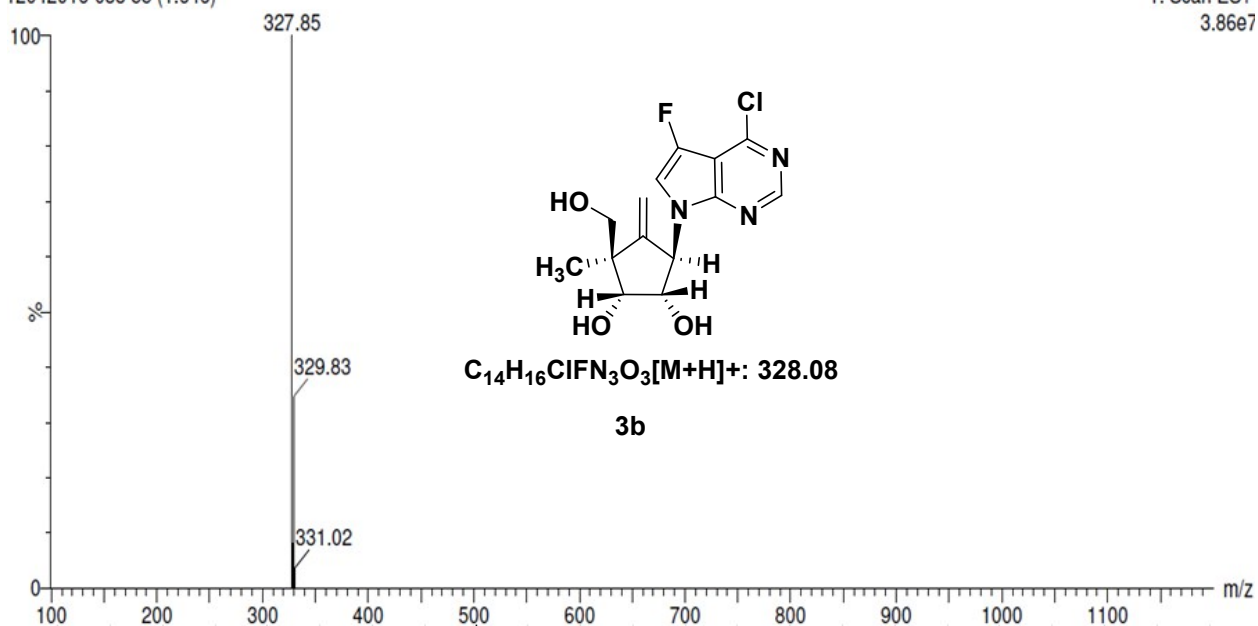

Sample Name:  
PMDR-C0568-183

Solvent: cd3od  
Date: Apr 7 2016  
Agilent 400-MR / NMR-3  
Request No: 021604A7326\_PROTON

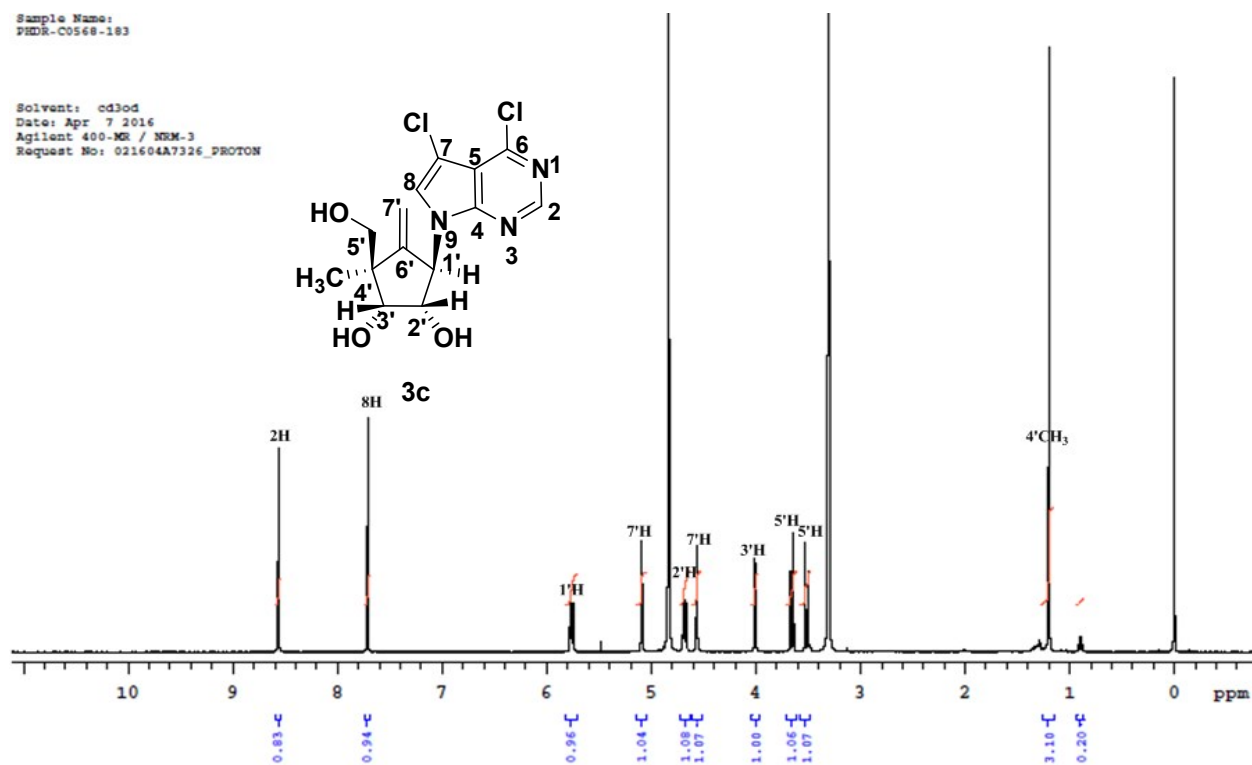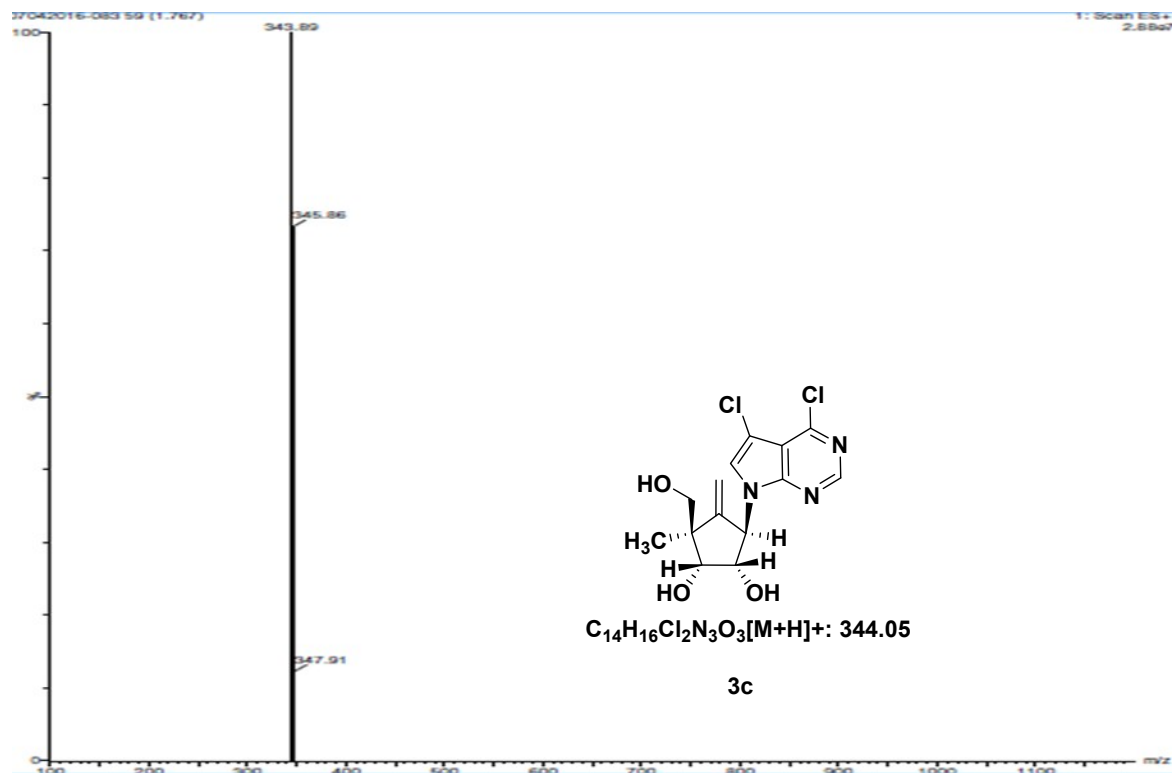

Sample Name:  
FMR-C0368-182

Solvent: cd3od  
Date: Apr 7 2016  
Agilent 400-MR / NMR-3  
Request No: 021604A7325\_PROTON

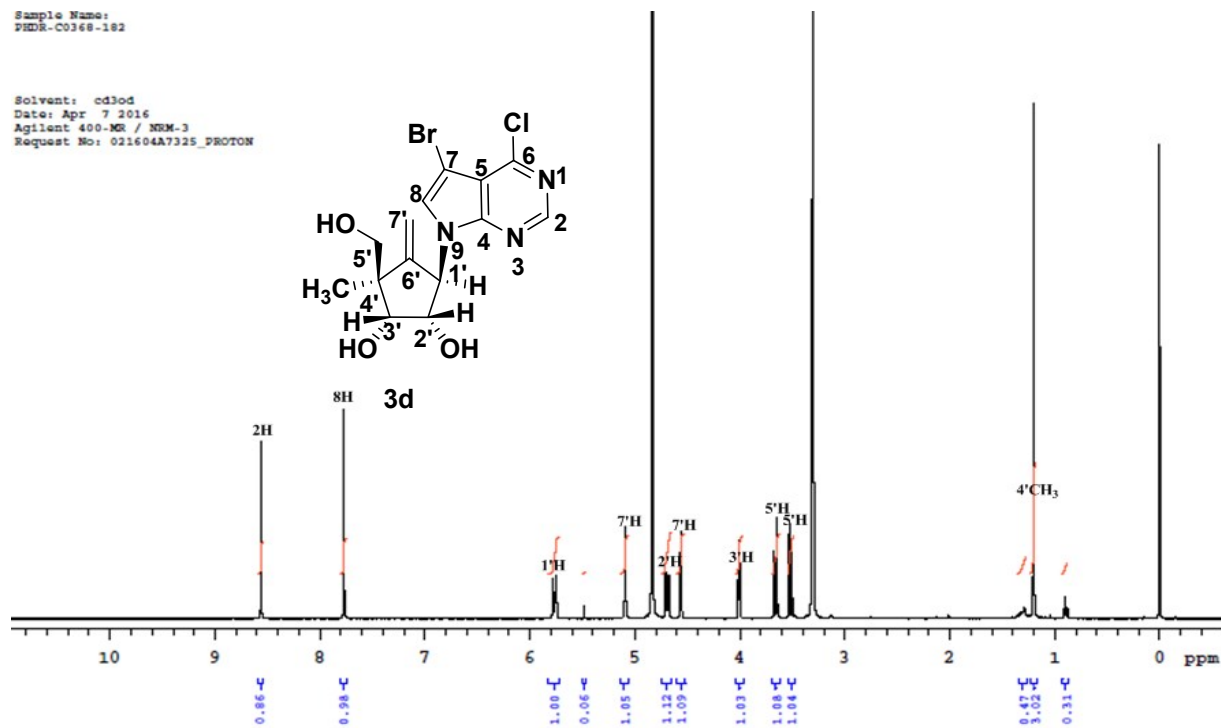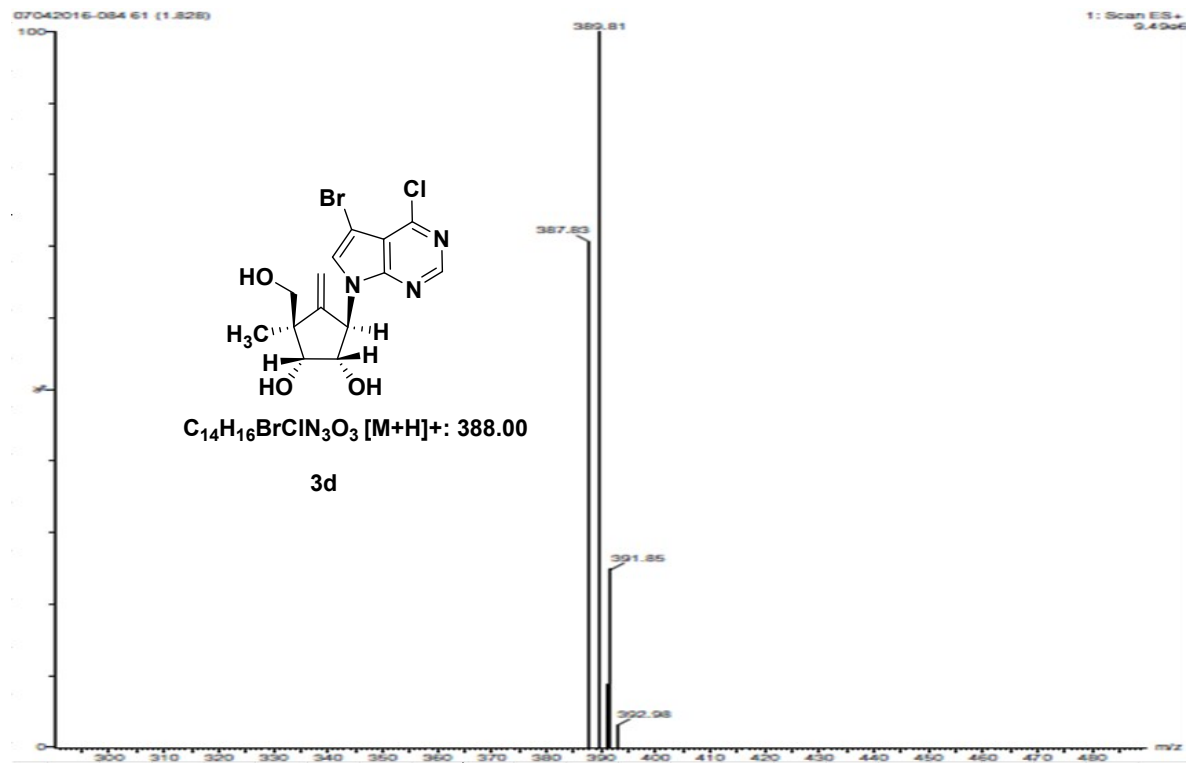

Sample Name:  
PMDR-C0368-177

Solvent: cd3od  
Date: Apr 4 2016  
Agilent 400-MR / NMR-3  
Request No: 021604A2808\_PROTON

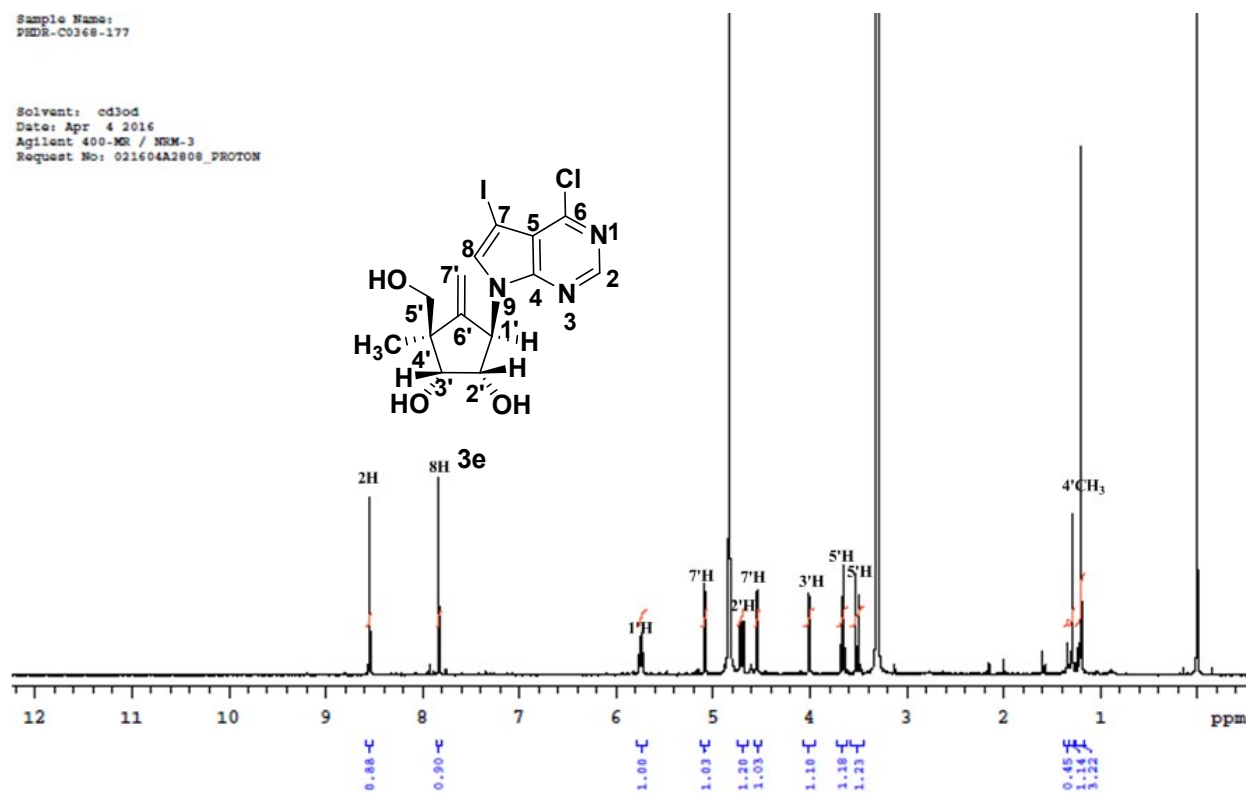

04042016-069 61 (1.827)

1: Scan ES+  
1.58e7

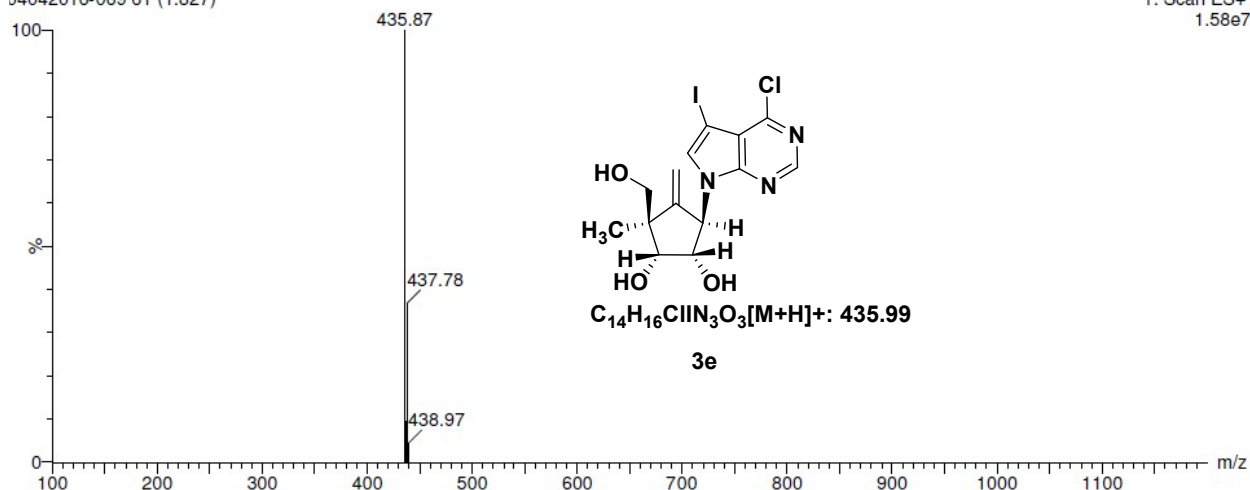

Sample Name:  
FMR-C0368-181

Solvent: cd3od  
Date: Apr 14 2016  
Agilent 400-MR / NMR-3  
Request No: 021604B2699\_PROTON

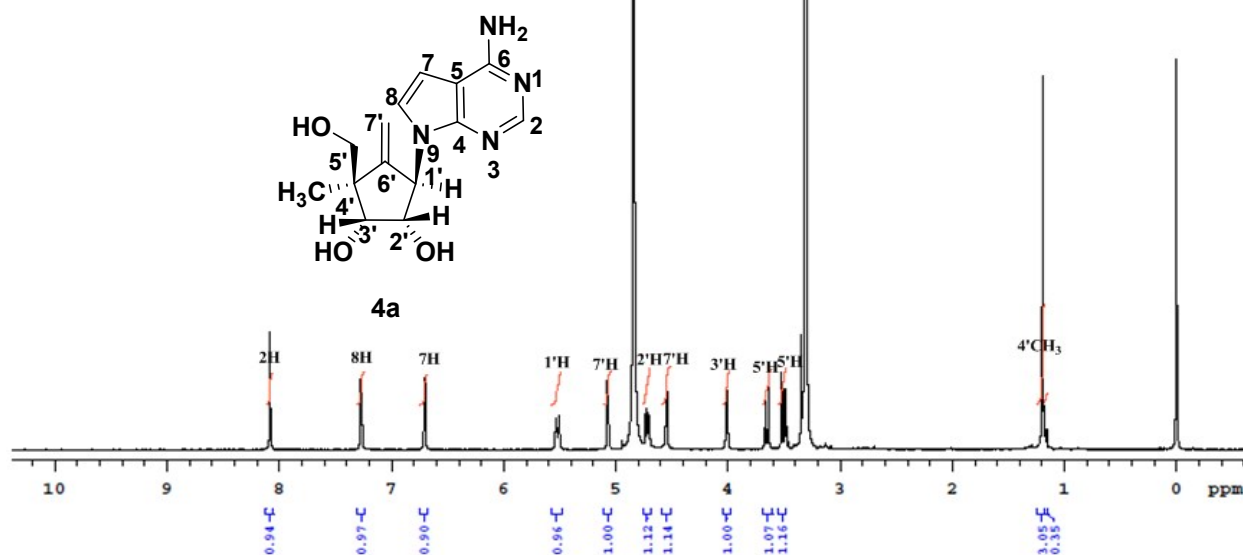

Plotname: 021604B2699\_PROTON\_01\_plot01

Sample Name :  
FMR-C0368-181  
Solvent: dmsd  
VNMRS-400/NMR-1/NMR-002  
Date: May 14 2016

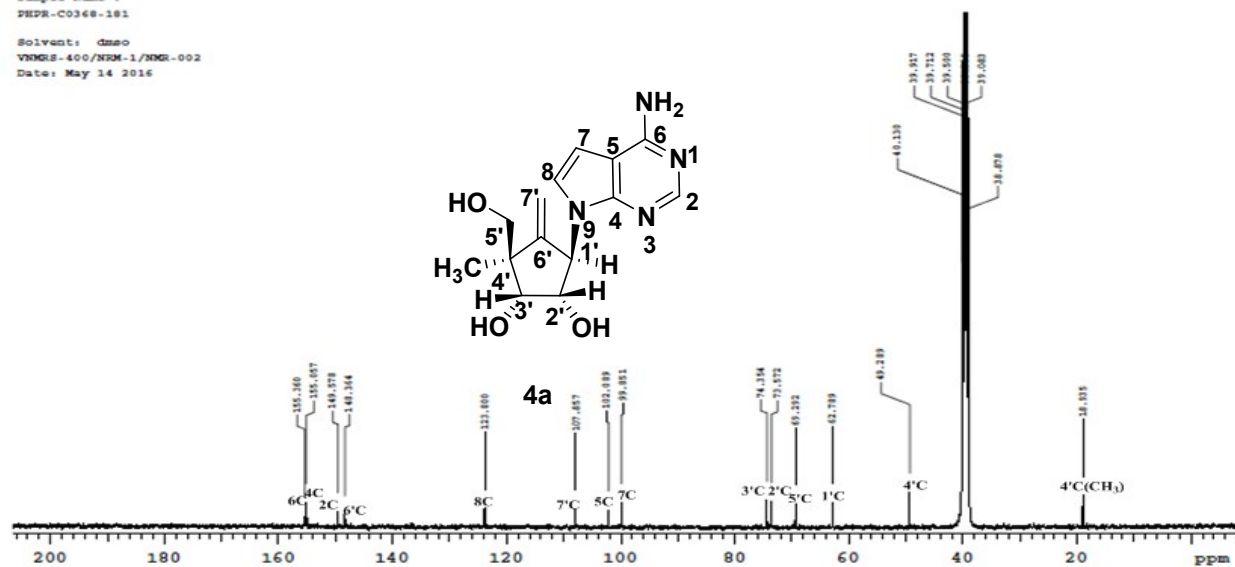

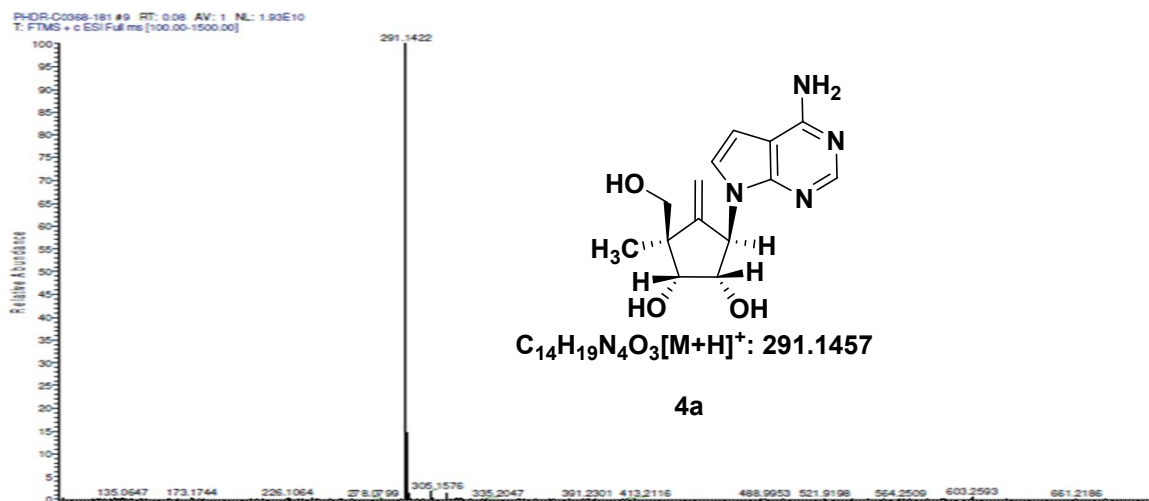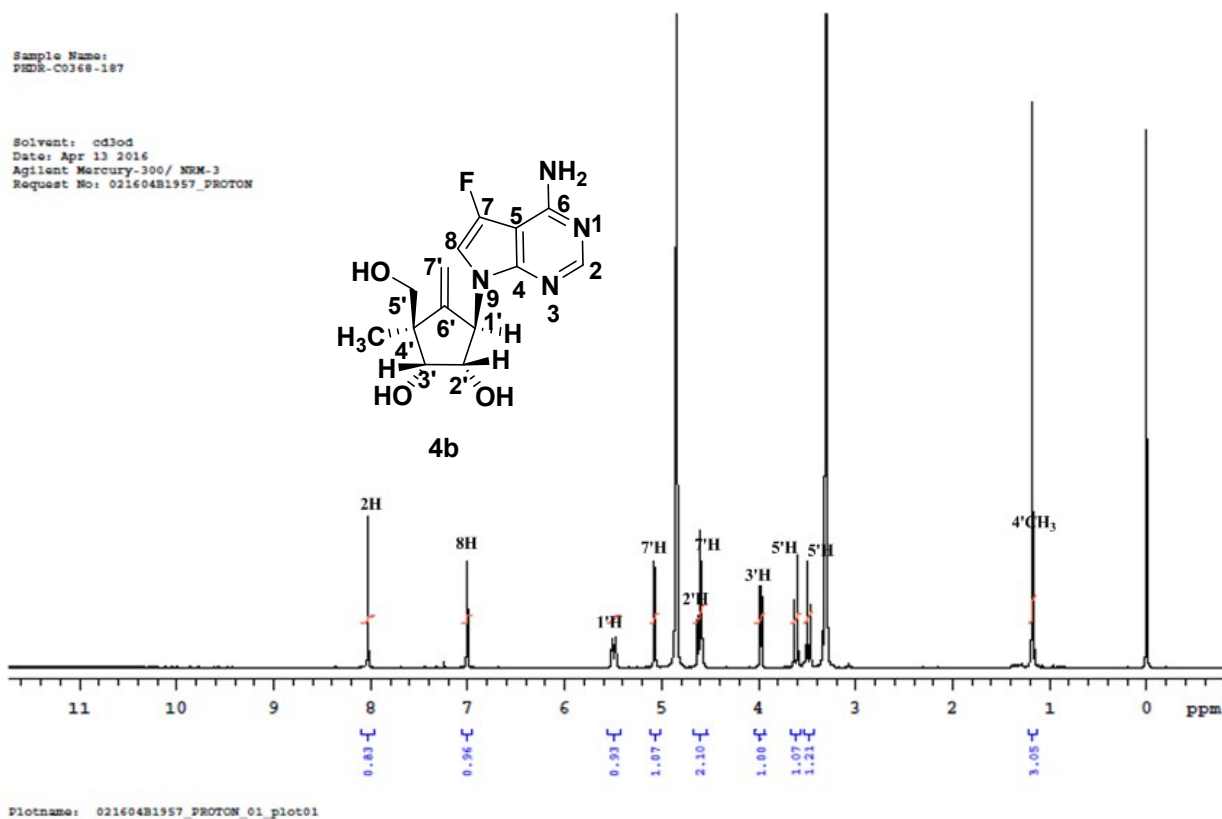

Sample Name:  
PMDR-C0368-187

Solvent: dmsc  
Date: May 15 2016  
Agilent Vnmrj300 / NMR-3  
Request No: 021605A7528 CARBON

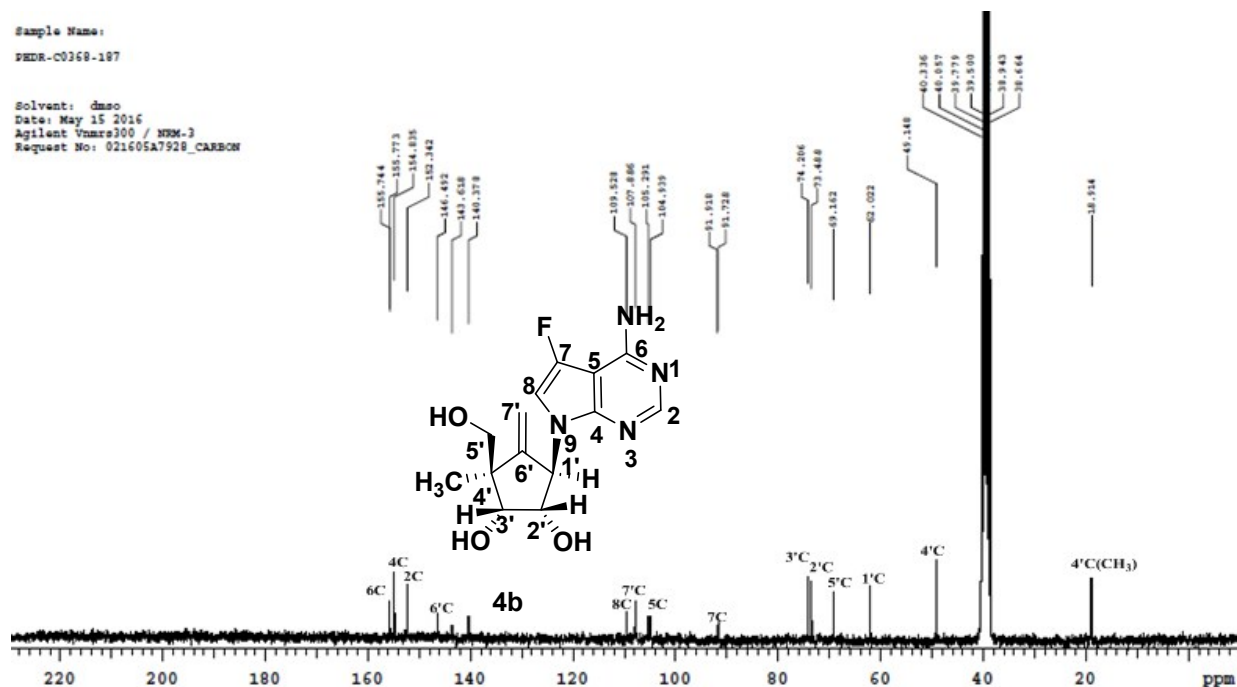

C0368-187

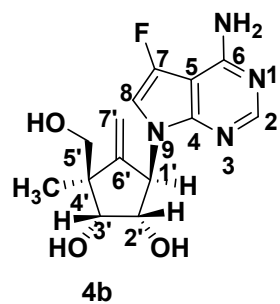

168.25

Current Data Parameters  
NAME 021809b3914-C0368-187  
EXPNO 11  
PROCNO 1

F2 - Acquisition Parameters  
Date\_ 20180917  
Time 12.11 h  
INSTRUM CAB AV4 400 MHZ BASIC  
PROBHD Z116098\_0700 (4  
PULPROG zg  
TD 131072  
SOLVENT DMSO  
NS 64  
DS 4  
SWH 90909.094 Hz  
FIDRES 1.387163 Hz  
AQ 0.7208960 sec  
RG 101  
DW 5.500 usec  
DE 6.50 usec  
TE 298.2 K  
D1 1.00000000 sec  
TD0 1  
SFO1 376.1869302 MHz  
NUC1 13C  
P1 18.00 usec  
PLW1 24.36100006 W

F2 - Processing parameters  
SI 65536  
SF 376.2245526 MHz  
WDW EM  
SSB 0 3.00 Hz  
LB 0  
GB 0  
PC 1.00

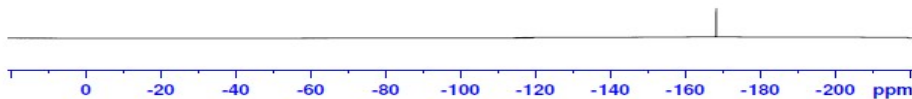

PHOR-C0368-187 #9 RT: 0.08 AV: 1 NL: 1.84E10  
T: FTMS + c ESI Fullms [100.00-1500.00]

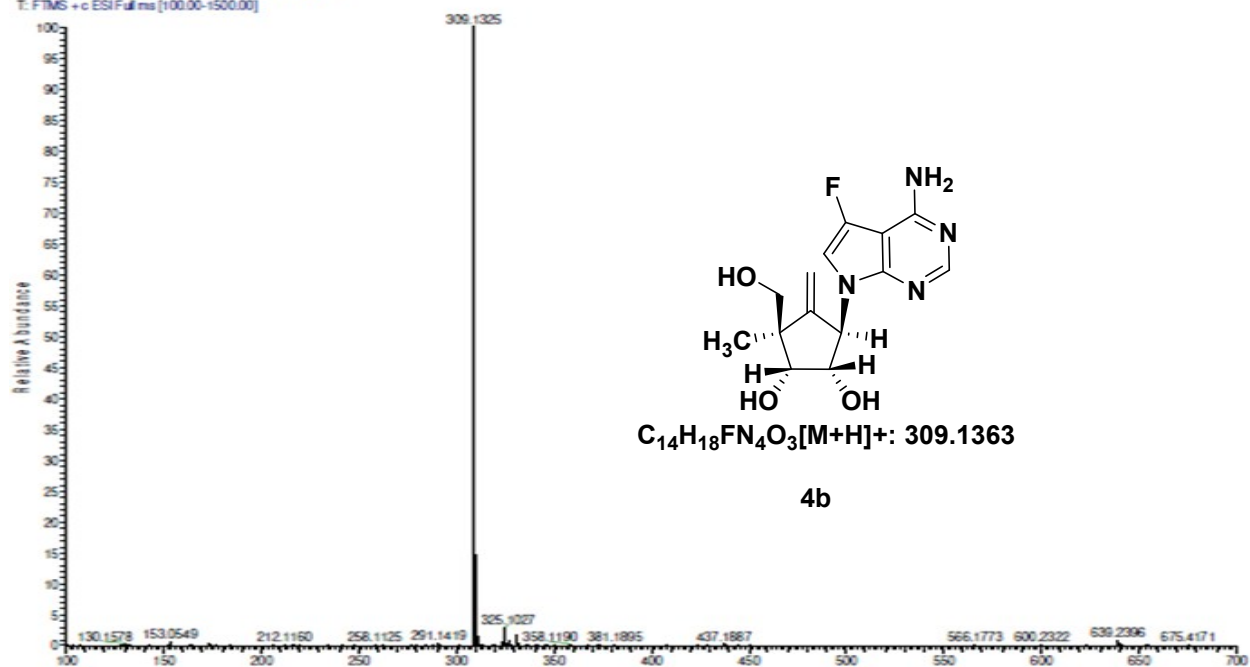

Sample Name:  
PHOR-C0368-184

Solvent: cdcl3  
Date: Apr 11 2016  
Agilent Vnmr300 / NMR-3  
Request No: 021604A8635\_proton

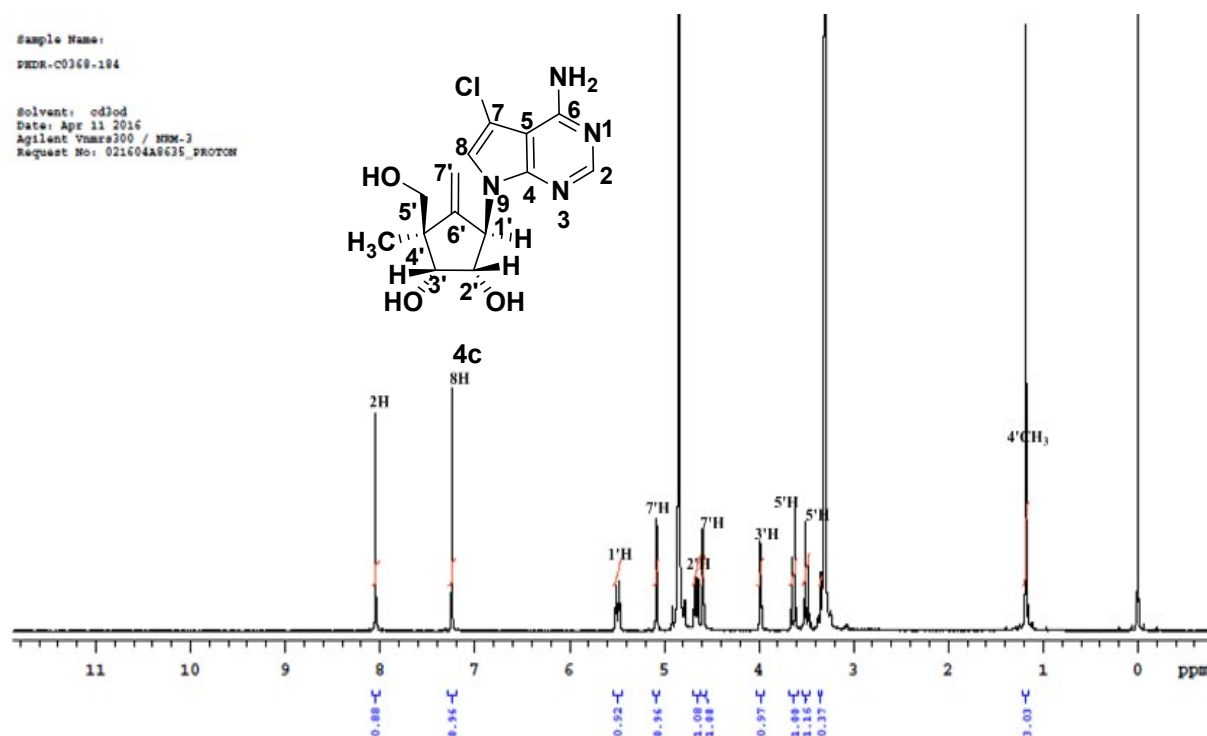

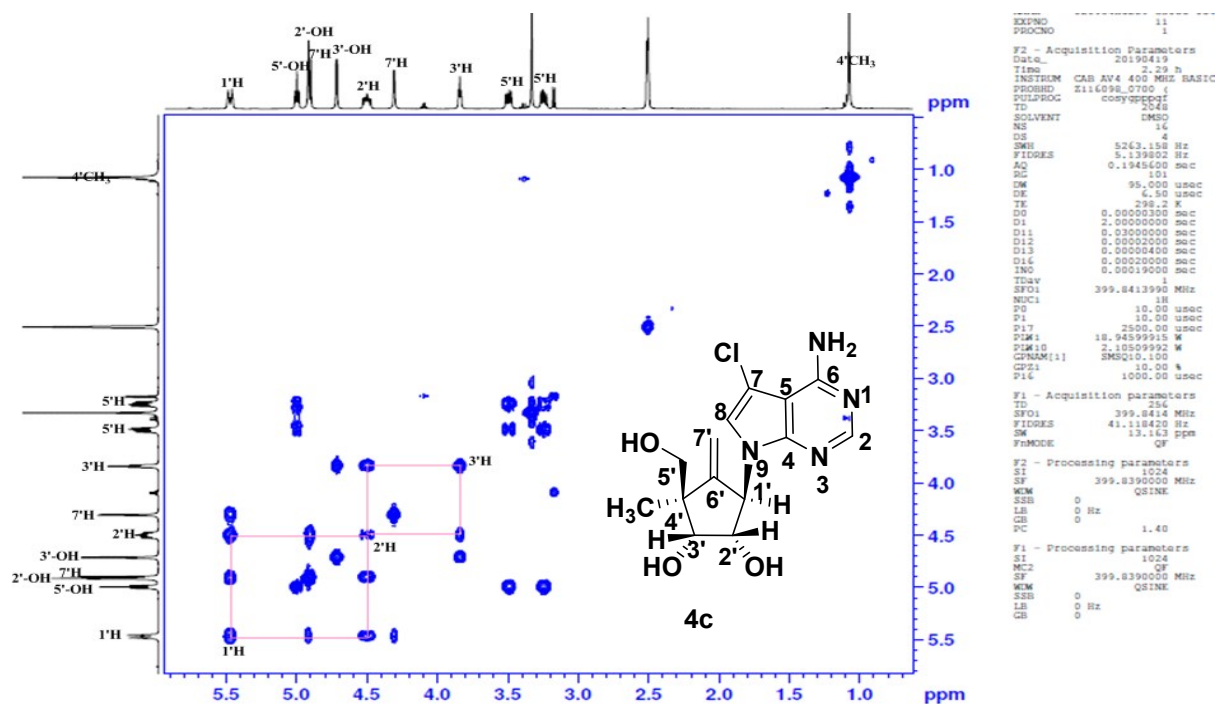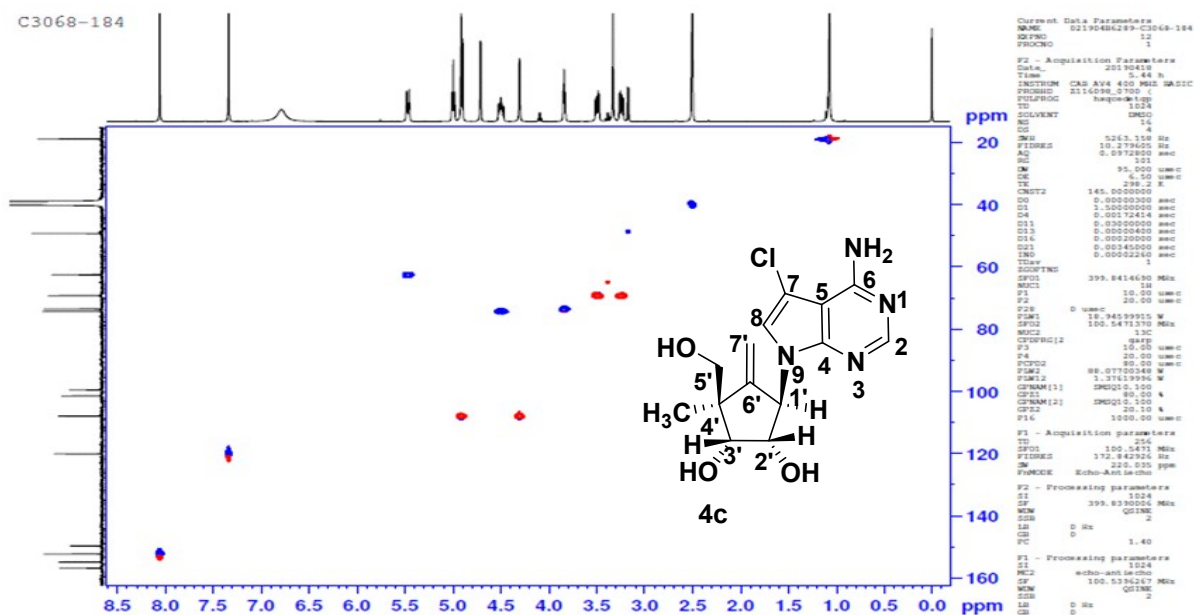

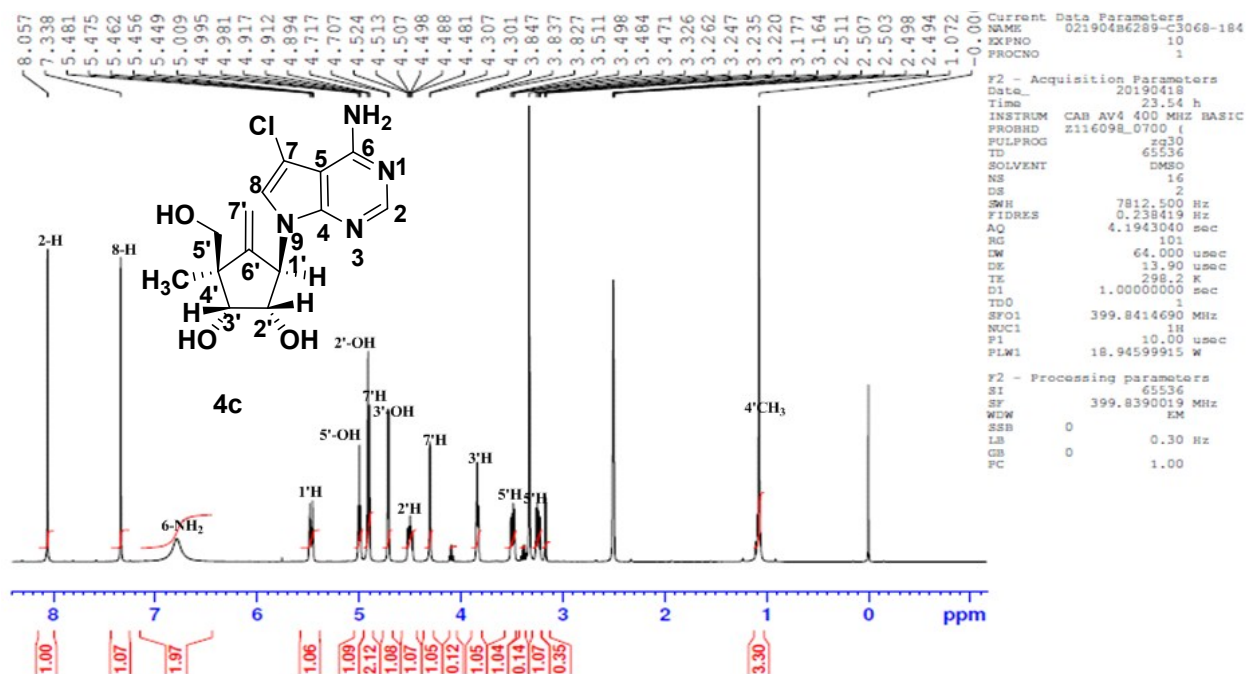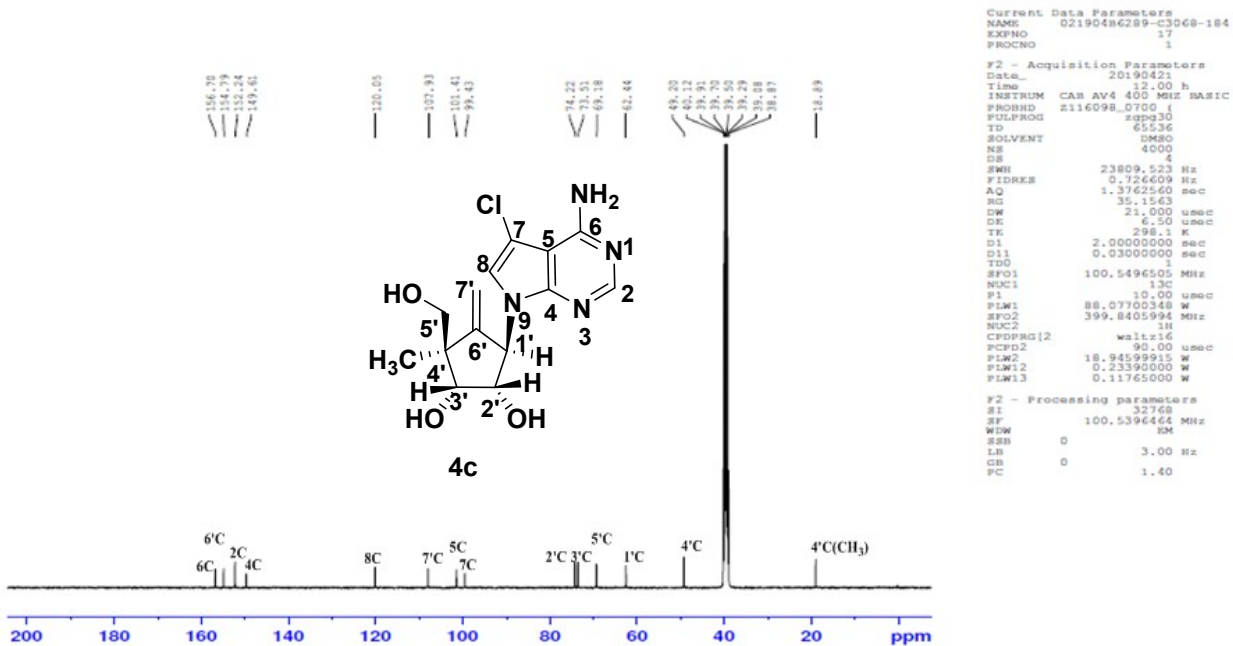



PHDR-C0368-184#9 RT: 0.08 AV: 1 NL: 1.54E10  
T: FIMS +c ESIFullms [100.00-1500.00]

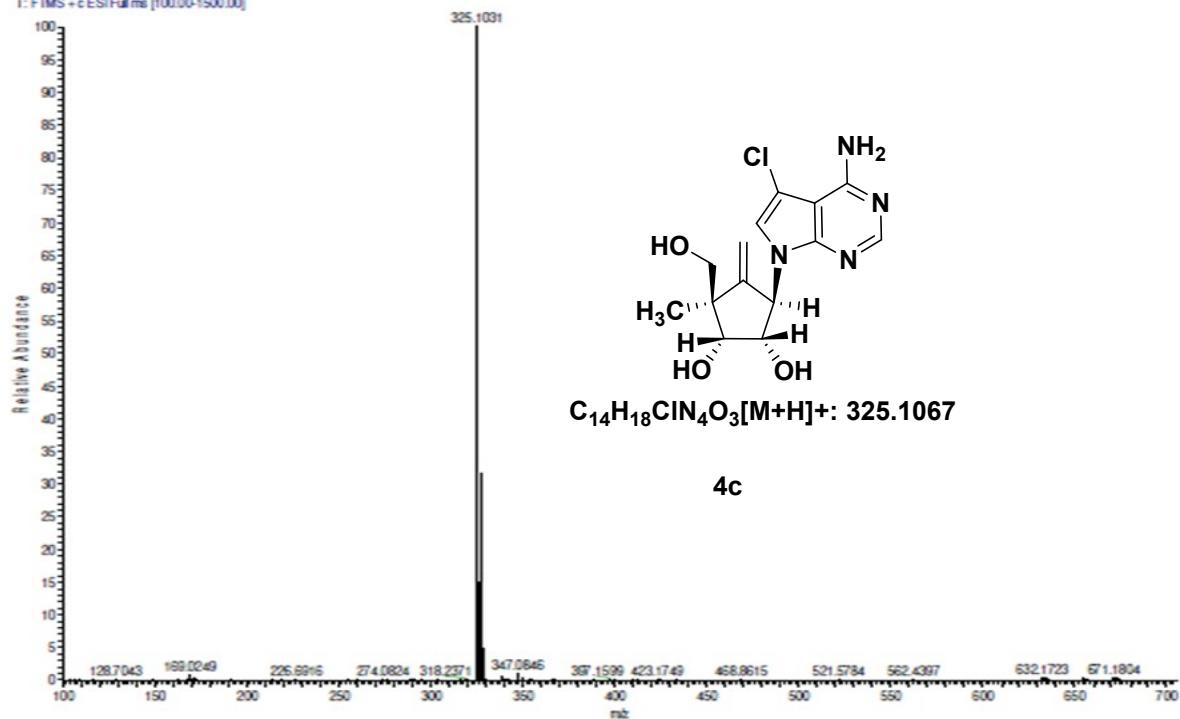

Sample Name:  
PHDR-C0368-185

Solvent: cd3od  
Date: Apr 12 2016  
Agilent Mercury-300/ NMR-3  
Request No: 021604B0003\_PROTON

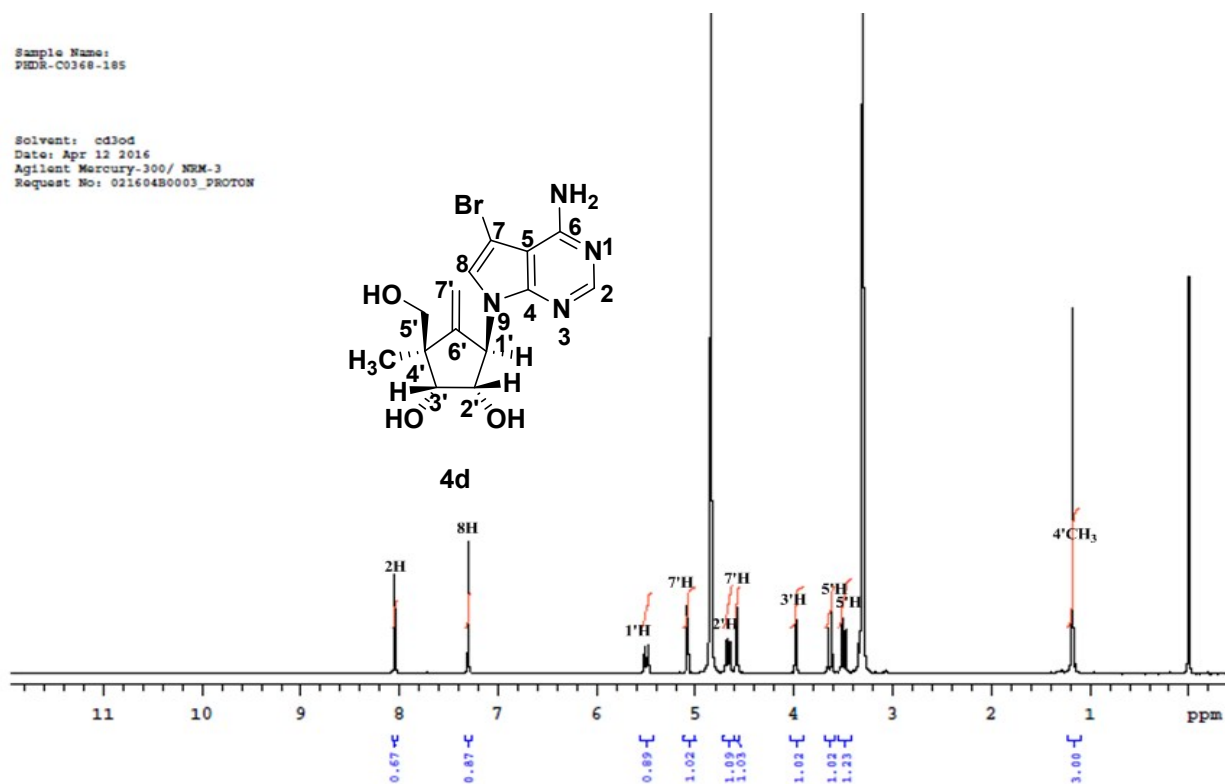

Plotname: 021604B0003\_PROTON\_01\_plot01

Sample Name:  
PUDR-C0368-180

Solvent: DMSO  
Date: Apr 22 2016  
Agilent 400-MHz / NMR-3  
Request No: 021604B5476\_CARBON

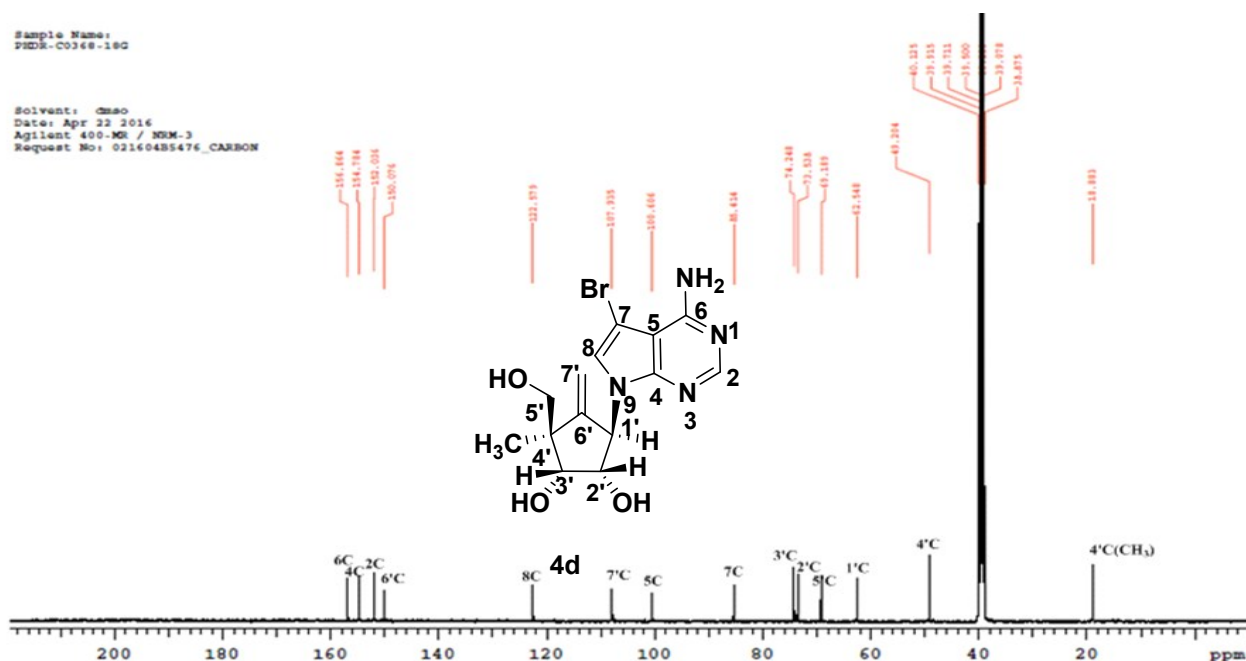

Plotname: 021604B5476\_CARBON\_01\_plot01

PHDR-C0368-185#9 RT: 0.08 AV: 1 NL: 1.09E10  
T: FTMS + c ESI Full ms [100.00-1500.00]

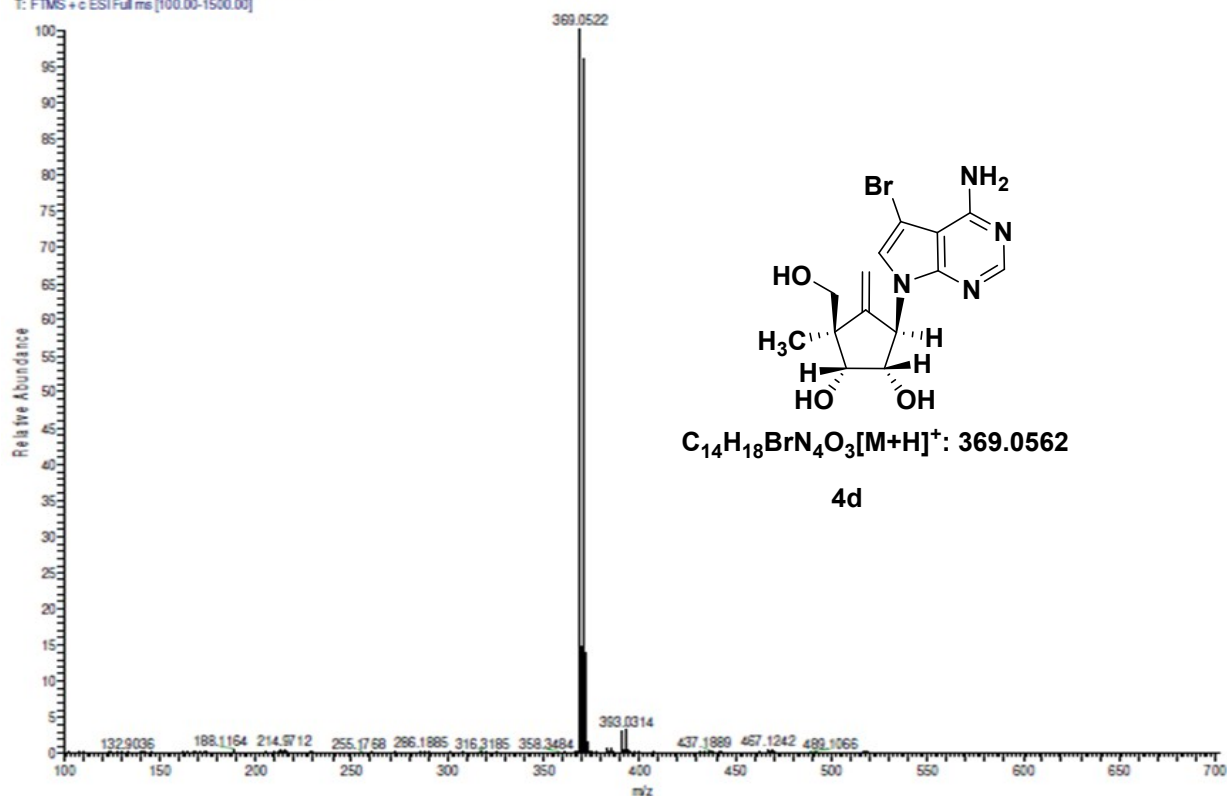

Sample Name:

PKDR-C0368-179

Solvent: cd3od

Date: Apr 11 2016

Agilent Vnmr300 / NMR-3

Request No: 021604A8090\_PROTON

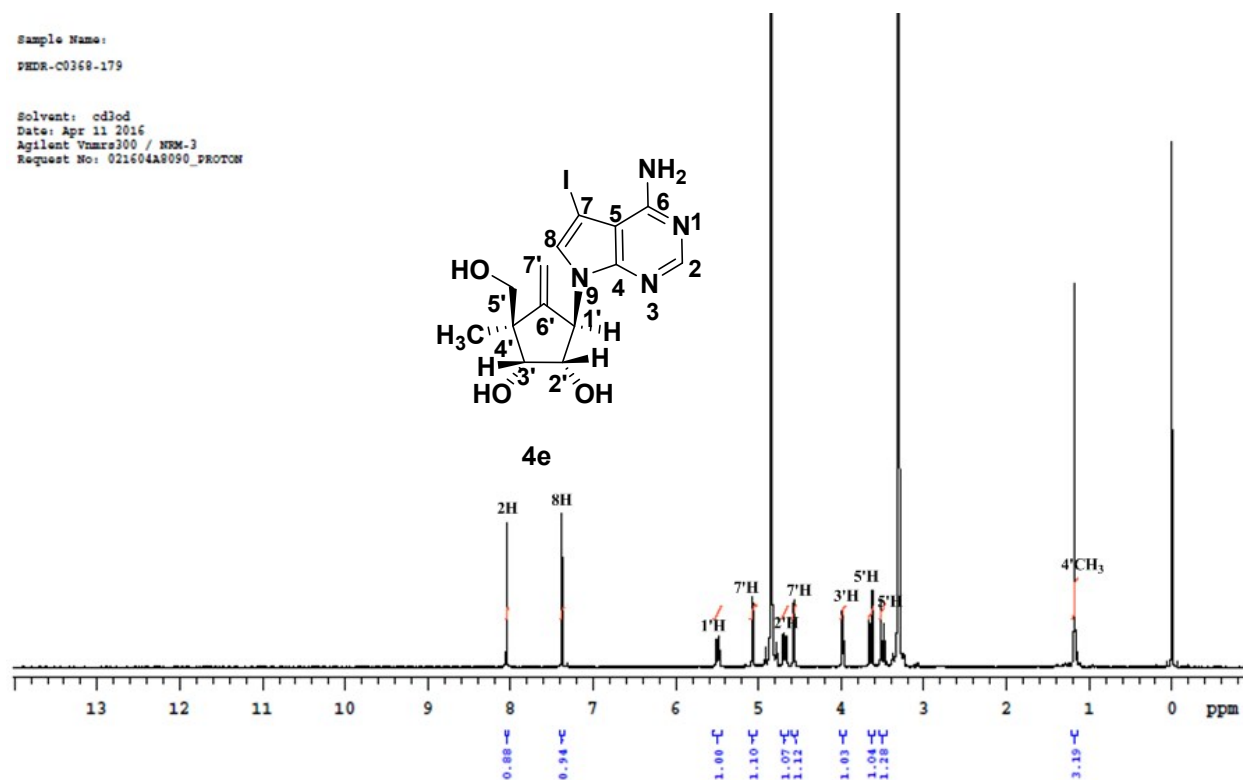

Plotname: 021604A8090\_PROTON\_01\_plot01

Sample Name :

PKDR-C0368-179

Solvent: dms

VNMRS-400/NMR-1/NMR-002

Date: May 15 2016

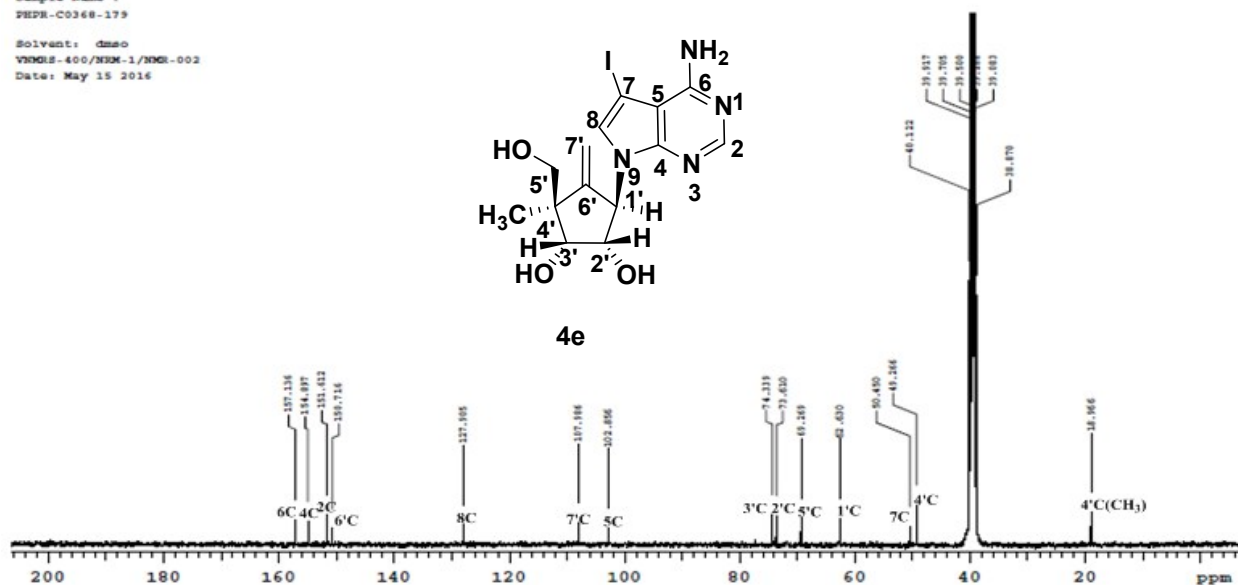

PRDR-C0368-179#9 RT: 0.08 AV: 1 NL: 1.96E10  
T: FTMS + c ESI Full ms [100.00-1500.00]

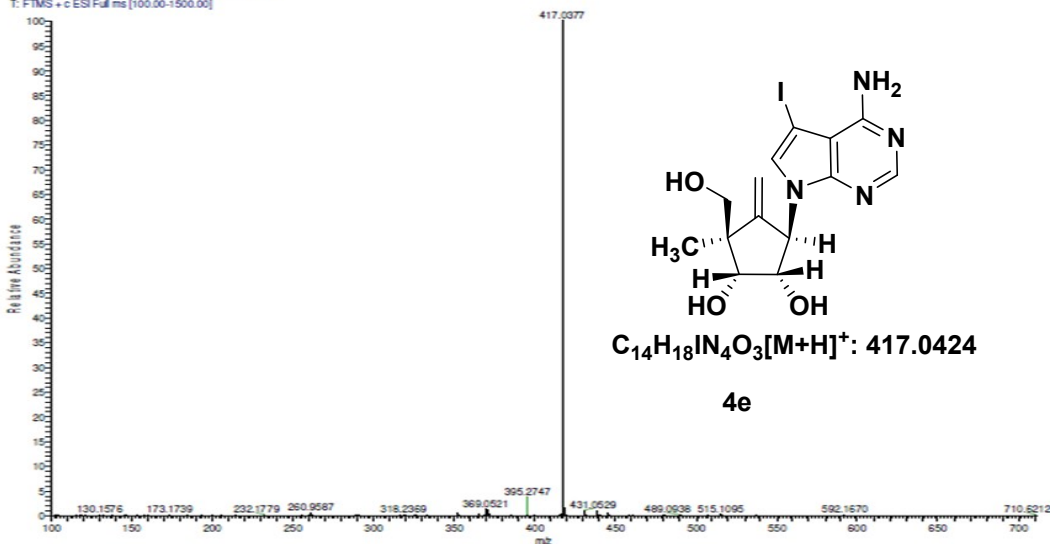

Sample Name:  
PRDR-C0368-198

Solvent: cd3od  
Date: Apr 19 2016  
Agilent Vnmr300 / NMR-3  
Request No: 02160486347\_PROTON

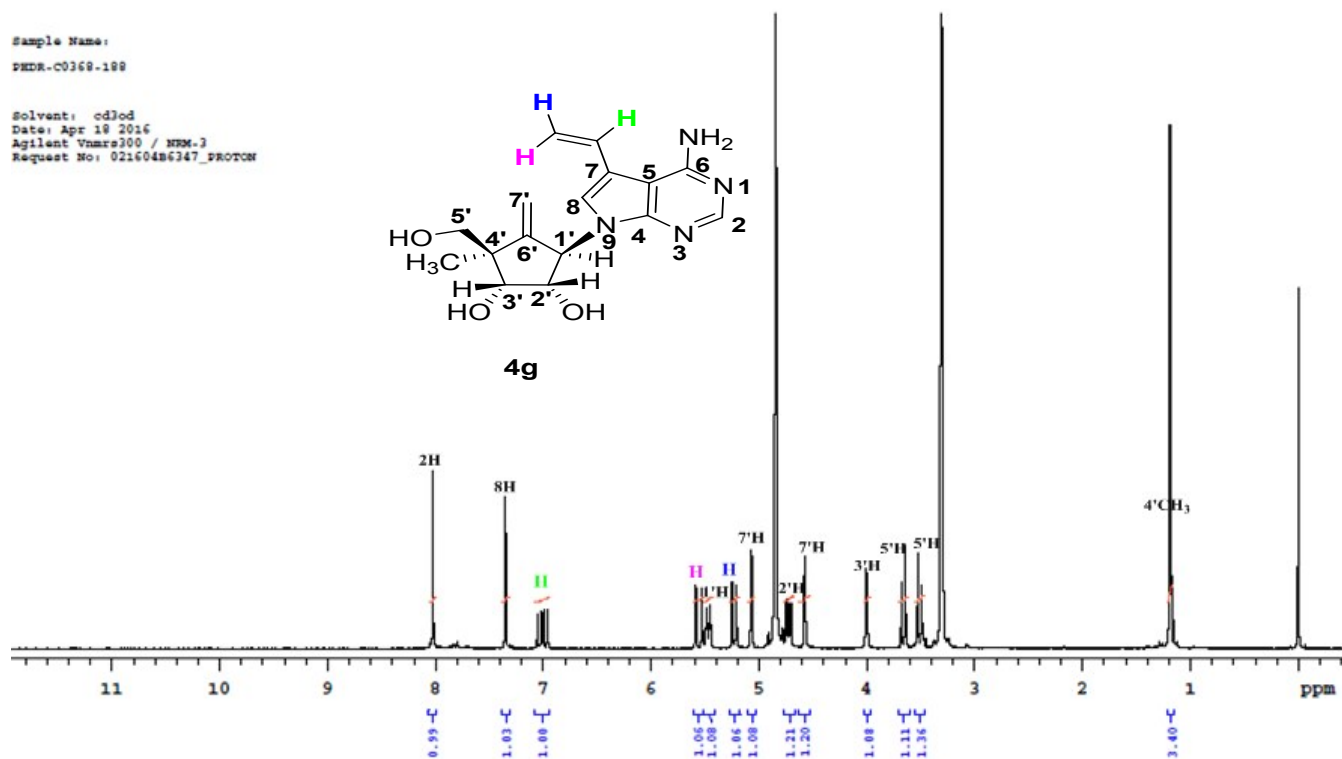

Sample Name :  
PHDR-C0368-188  
Solvent: dmsd  
VMDIS-400/KRM-1/NOEL-002  
Date: May 15 2016

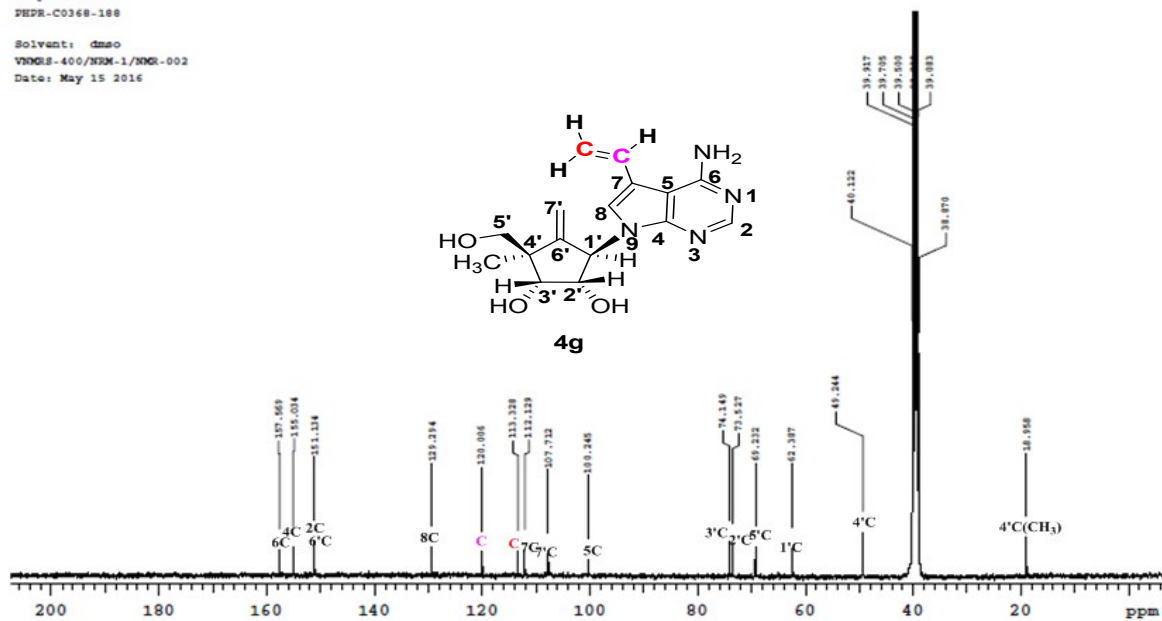

PHDR-C0368-188#9 RT: 0.08 AV: 1 NL: 1.69E10  
T: FTMS + c ESI Full ms [100.00-1500.00]

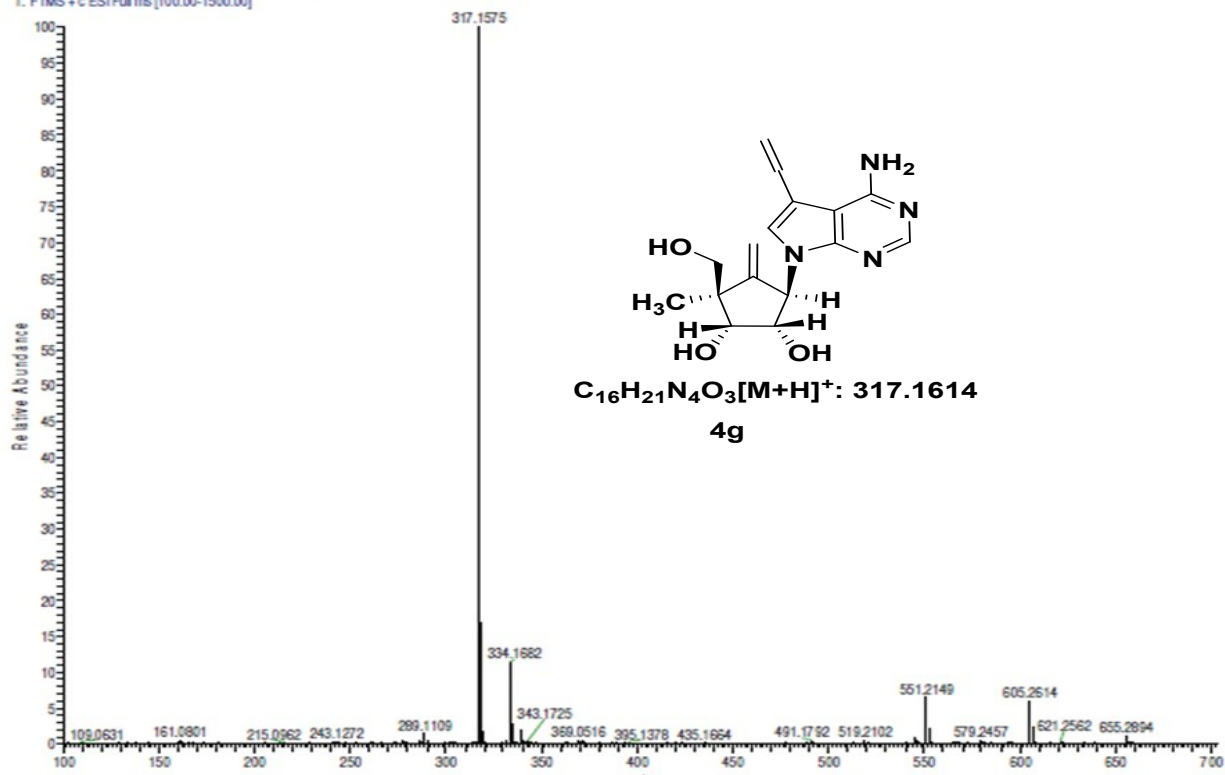

Sample Name:  
PHPR-C0368-190

Solvent: cd3od  
Date: Apr 21 2016  
Agilent 400-MR / NMR-3  
Request No: 021604C1182\_PROTON

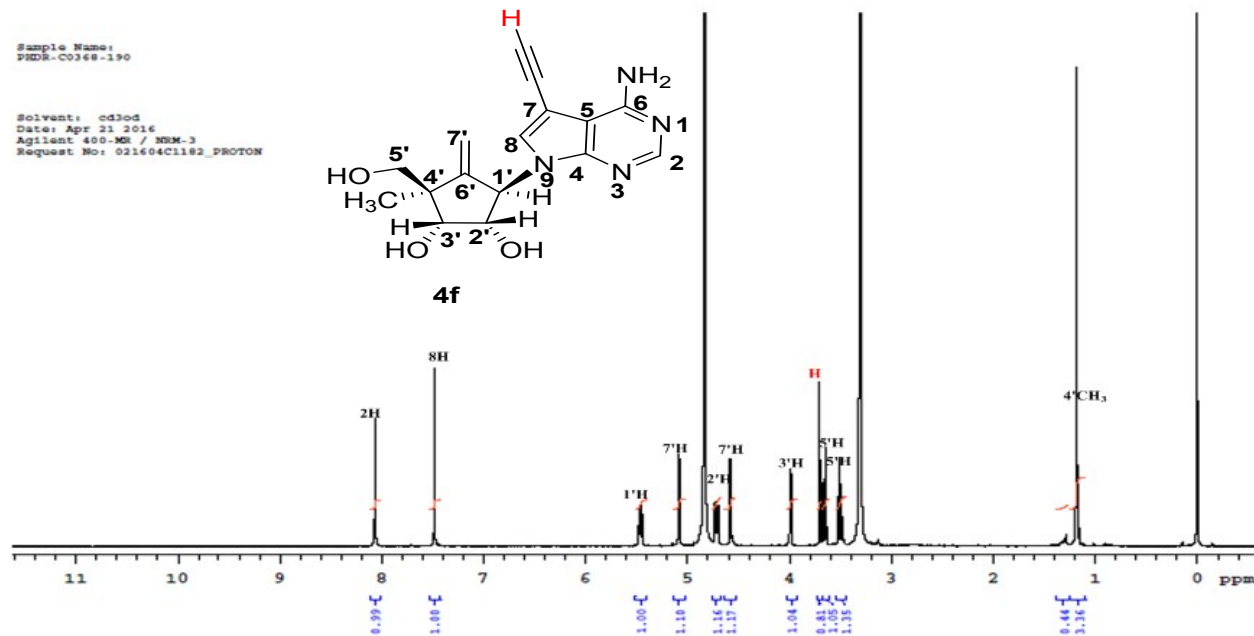

Plotname: 021604C1182\_PROTON\_01\_plot01

Sample Name :  
PHPR-C0368-190  
Solvent: dmsd  
VNMIS-400/NMR-1/NMR-002  
Date: May 15 2016

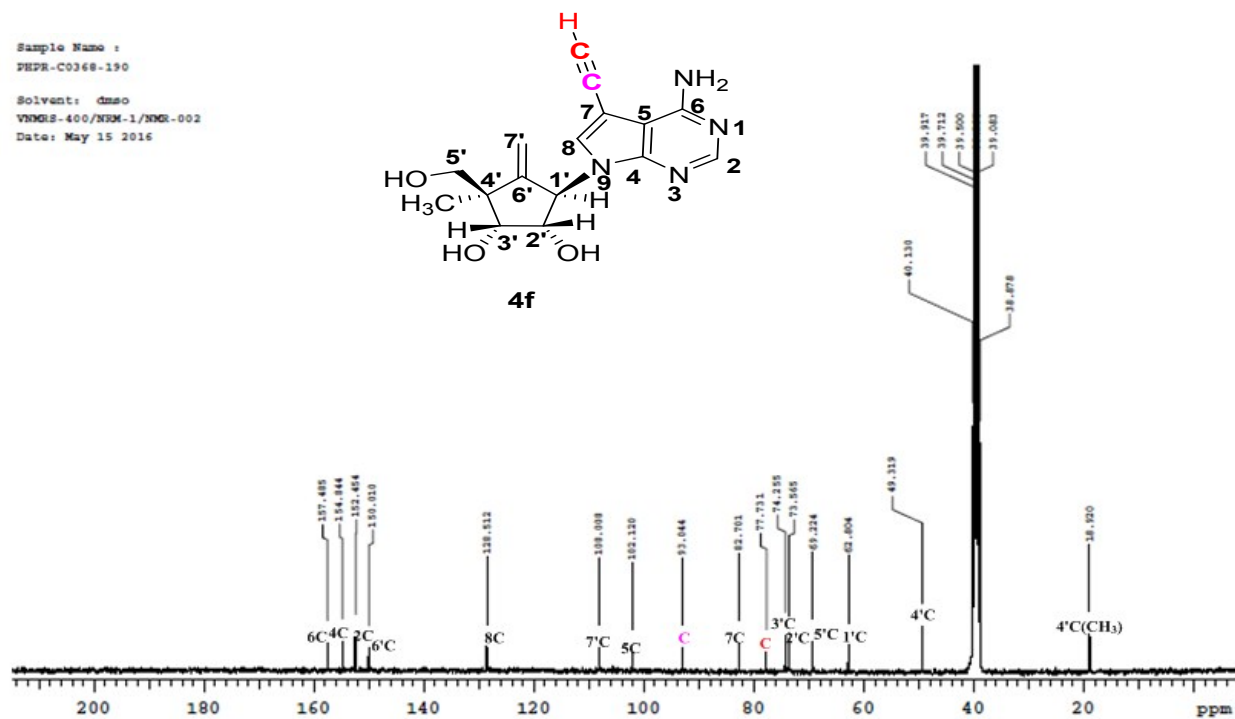

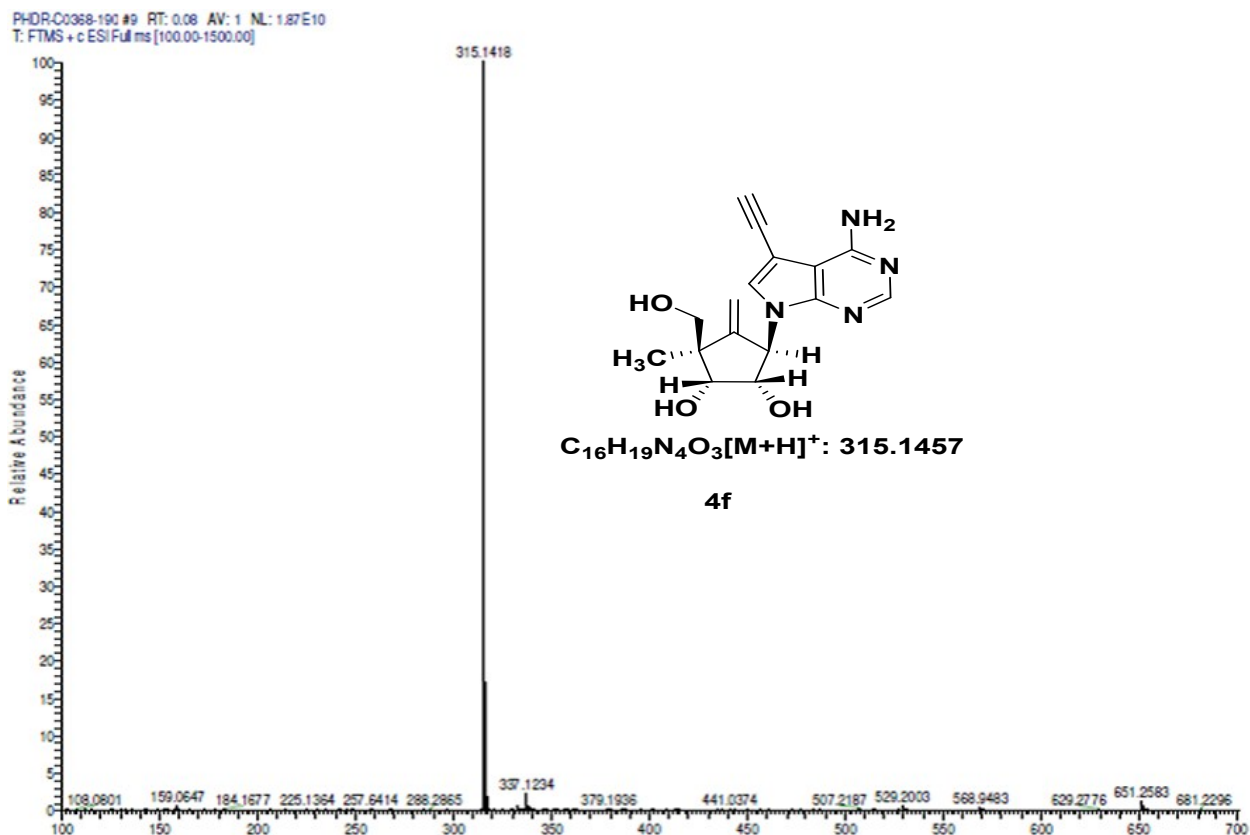

### X-ray Crystal Structure Data of 4c:

$C_{14}H_{17}ClN_4O_3$  (M = 324.7650 g/mol): monoclinic, space group P21 (no. 4), unit cell dimensions  $a = 6.28(5)$  Å  $\alpha = 90^\circ$ ,  $b = 9.06(10)$  Å  $\beta = 90.1(6)^\circ$ ,  $c = 9.91(6)$  Å  $\gamma = 90^\circ$ ,  $V = 765.46(9)$  Å<sup>3</sup>,  $Z = 2$ ,  $T = 293$  K,  $D_{\text{calc}} = 1.405$  Mg/m<sup>3</sup>, Data completeness = 1.84/1.00,  $\Theta(\text{max}) = 26.370$ ,  $R(\text{reflections}) = 0.0352(2863)$ ,  $R_2(\text{reflections}) = 0.0985(3147)$ ,  $s = 0.952$  and  $N_{\text{par}} = 222$ .
